# Supplementary material for: How does the process of group singing impact on people affected by cancer? A grounded theory study
Source: PubMed Central journal article supplement (PMC6326295; doi:10.1136/bmjopen-2018-023261), 2019-01-07
Supplement: bmjopen-2018-023261.draft_revisions.pdf [file bmjopen-2018-023261.draft_revisions.pdf]

# BMJ Open

BMJ Open is committed to open peer review. As part of this commitment we make the peer review history of every article we publish publicly available.

When an article is published we post the peer reviewers' comments and the authors' responses online. We also post the versions of the paper that were used during peer review. These are the versions that the peer review comments apply to.

The versions of the paper that follow are the versions that were submitted during the peer review process. They are not the versions of record or the final published versions. They should not be cited or distributed as the published version of this manuscript.

BMJ Open is an open access journal and the full, final, typeset and author-corrected version of record of the manuscript is available on our site with no access controls, subscription charges or pay-per-view fees (<http://bmjopen.bmj.com>).

If you have any questions on BMJ Open's open peer review process please email [editorial.bmjopen@bmj.com](mailto:editorial.bmjopen@bmj.com)

# BMJ Open

## How does the process of group singing impact upon people affected by cancer? A grounded theory study

|                               |                                                                                                                                                                                                                                                                                                                                          |
|-------------------------------|------------------------------------------------------------------------------------------------------------------------------------------------------------------------------------------------------------------------------------------------------------------------------------------------------------------------------------------|
| Journal:                      | <i>BMJ Open</i>                                                                                                                                                                                                                                                                                                                          |
| Manuscript ID                 | bmjopen-2018-023261                                                                                                                                                                                                                                                                                                                      |
| Article Type:                 | Research                                                                                                                                                                                                                                                                                                                                 |
| Date Submitted by the Author: | 01-Apr-2018                                                                                                                                                                                                                                                                                                                              |
| Complete List of Authors:     | Warran, Katey; The University of Edinburgh, Edinburgh College of Art Fancourt, Daisy; University College London Research Department of Epidemiology and Public Health, Department of Behavioural Science and Health<br>Wiseman, Theresa; The Royal Marsden NHS Foundation Trust, ; University of Southampton, Faculty of Health Sciences |
| Keywords:                     | ONCOLOGY, QUALITATIVE RESEARCH, MENTAL HEALTH, Adult oncology < ONCOLOGY, THERAPEUTICS                                                                                                                                                                                                                                                   |
|                               |                                                                                                                                                                                                                                                                                                                                          |

SCHOLARONE™  
Manuscripts

Peer Review Only

## How does the process of group singing impact upon people affected by cancer? A grounded theory study

Katey Warran<sup>1</sup> Daisy Fancourt<sup>2</sup> Theresa Wiseman<sup>3</sup>

**Objective:** This study aimed to build an understanding of how the process of singing impacts upon those who are affected by cancer, including patients, staff, carers and those who have been bereaved.

**Design:** A qualitative study, informed by a Grounded Theory approach.

**Setting and participants:** Cancer patients, staff, carers and bereaved who had participated for a minimum of 6 weeks in one of two choirs for people affected by cancer.

**Methods:** 32 participants took part in Focus Group Interviews lasting between 45 minutes and an hour, and 1 participant had a face to face interview.

**Findings:** Four overarching themes emerged from the iterative analysis procedure. The overarching themes were: building resilience, dynamics of the group, psychological dimensions, and features of learning. Following further analyses, a theoretical model was created to depict how building resilience underpins the findings.

**Conclusion:** Group singing may be a suitable intervention for building resilience in those affected by cancer via an interaction between the experience and impact of the choir.

### Strengths and limitations of this study

- This is the first grounded theory study to have been conducted to explore the impact of group singing for those affected by with cancer.
- 33 participants took part spanning patients, staff, carers and bereaved, and saturation was reached.
- This study was concerned with people affected by any type of cancer, but it remains for future studies to establish whether singing had a specific bespoke impact for people with different types of cancer.
- This study used focus group and one-to-one interviews to provide in-depth data to understand shared perspectives and individual experiences, but as no participant observations were undertaken, the behaviours of participants during the singing sessions themselves remain unstudied.

## INTRODUCTION

There is growing awareness about the psychosocial challenges faced by cancer patients. Major depression rates are approximately five times higher in cancer patients than the general population (Irwin, Olmstead, Ganz, & Haque, 2013), with many cases undiagnosed, and only 30-35% of patients achieving remission (Irwin et al., 2013). Patients can also experience more generalised worry, such as heightened sense of vulnerability, inability to make plans and a fear for the future, anger, isolation, diminished self-esteem, concerns over body image, mood disturbance, changes in sexual function and changes in relationships with others (Adler, Page, & Setting, 2008; Council, 2005). These symptoms can be aggravated by changes in patients' daily lives, such as reduced or terminated employment and financial stress. Even 10 years after treatment, 54% of cancer survivors still suffer from at least one psychological issue (Macmillan Cancer Care, 2009).

---

<sup>1</sup> The University of Edinburgh, Edinburgh, UK

<sup>2</sup> University College London, London, UK

<sup>3</sup> The Royal Marsden NHS Foundation Trust, London, UK

Correspondence to: Katey Warran [katey.warran@ed.ac.uk](mailto:katey.warran@ed.ac.uk)

1  
2  
3 Furthermore, cancer patients are not the only individuals affected by cancer. Caregivers (whether  
4 family or friends) can experience psychosocial challenges commensurate with, or even greater than,  
5 those experienced by cancer patients (Hodges, Humphris, & Macfarlane, 2005). Caregivers who  
6 suffer bereavement are at increased risk for physical and mental morbidity (Williams & McCorkle,  
7 2011). Healthcare professionals are also distressed due to emotionally demanding work, resulting in  
8 reduced career satisfaction, emotional exhaustion, stress and depression (Medisauskaite & Kamau,  
9 2017).

10  
11 In light of these challenges, studies have shown that 1 in 4 female cancer patients and 1 in 10 male  
12 cancer patients desire psychological support. However, frequently people who most need such  
13 support are not those who seek it (Merckaert et al., 2010), and attendance at conventional support  
14 groups is low (Bui et al., 2002; Pascoe, Edelman, & Kidman, 2000; Sautier, Mehnert, Höcker, &  
15 Schilling, 2014).

16  
17 Although research in this area is still emerging, group singing has been suggested as a suitable  
18 intervention for those affected by cancer to support psychosocial needs (Gale, Enright, Reagon,  
19 Lewis, & van Deursen, 2012; Reagon, Gale, Enright, Mann, & van Deursen, 2016). Just 70 minutes of  
20 singing has been found to be associated with emotional changes, including reductions in self-rated  
21 fear, anger, confusion, sadness, tension, tiredness, anxiety and stress and improvements in energy,  
22 happiness, relaxation and social connectedness (Fancourt et al., 2016). Three-month singing  
23 interventions for patients with lung cancer have been shown to be associated with improvements in  
24 vitality, social functioning and mental health (Gale et al., 2012), while 6-month singing interventions  
25 have been shown to be associated with improvements in vitality, anxiety and overall mental health  
26 for carers and people who have been bereaved and with improvements in anxiety for cancer  
27 patients (Reagon, Gale, Dow, Lewis, & van Deursen, 2016). Further qualitative studies have identified  
28 improved confidence and self-esteem amongst people affected by cancer who sing in choirs (Gale,  
29 Enright, Reagon, Lewis and van Deursen, 2012) as well as stress relief, friendship and feelings of  
30 reward amongst cancer staff (O'Callaghan et al., 2010).

31  
32  
33 However, despite these few promising studies which suggest that group singing is a valuable  
34 support, there has been no attempt to build an evidence base regarding *why* singing may be  
35 beneficial for those affected by cancer. One previous study proposed that the main mechanism by  
36 which singing can affect quality of life in those affected by cancer is that it provides an uplifting  
37 musical experience within a supportive community context (Reagon et al., 2016), but this remains to  
38 be explored further. This research gap has been recognised more broadly in the context of other  
39 music interventions within health contexts, for example by DeNora and Ansdell (2014) who state  
40 that current research cannot describe *the processes* by which music effects change. Therefore, the  
41 aim of this study is to address this gap in the literature and to build an understanding of how the  
42 process of group singing impacts upon those affected by cancer, including patients, staff, carers and  
43 those who have been bereaved.

## 44 45 46 **METHOD**

### 47 48 **Study design**

49 A qualitative methodological approach informed by grounded theory was adopted. This systematic  
50 strategy entailed an iterative process of analysing data after each data collection period and  
51 constantly comparing data with data. This process allowed a theory of singing and cancer to emerge  
52 that was *grounded in the data* (Charmaz, 2014) as each emergent theme was inductively explored  
53 and adapted until the end of data collection when saturation had been reached (Corbin & Strauss,  
54 2015). Focus group interviews were chosen as the primary method as the research question  
55 demanded an understanding of *group* singing and therefore shared perspectives.

### Participants and procedure

This study was part of a larger 2-year investigation into singing for people affected by cancer. There were 3 cohorts recruited: (1) *Cohort A*: patients with stage I-III breast or colorectal cancer up to 24 months post diagnosis, as well as prostate cancer patients on active surveillance; (2) *Cohort B*: hospital staff, cancer carers (formal and informal) and those who had lost a family member or somebody they cared for to cancer in the last 3 years; and (3) *Cohort C*: anybody who had been affected by cancer who wanted to sing in a choir. The study was approved by the NHS Research Ethics Service.

Participants were invited to join a choir or assigned to a 'care as usual' group. Joining the choir involved weekly singing sessions of 60 minutes preceded by 30 minutes of socialising and refreshments for a period of up to 24 weeks. The choirs are led by professional choir leaders and the singing typically starts with a short warmup lasting 5-15 minutes, with the rest of the rehearsal being used to practice contemporary popular music songs. There is no sheet music and no musical experience required, and everyone reads from lyric sheets denoting the choral parts.

For this sub-study, participants who had consented to the larger study and joined the choirs were invited to take part. In accordance with grounded theory, the sample selection after the first group was guided by the data collection: the first focus group was conducted with a mixture of patients and non-patients but to explore whether the themes occurred with patients-only and with non-patients only, two further respective focus groups were held. A total of 54 eligible individuals were invited of whom 33 took part. (See Table 1 for participant demographics).

### Patient and public involvement

This study was carried out as part of a larger 2-year grant looking at singing for people affected by cancer. Cancer patients, carers and staff took part in focus groups to design the research questions at the start of the grant and approved all study designs and measures. Patients and public also actively took part in recruitment for the study and have helped to disseminate results from other completed phases of the grant.

### Data collection

Data collection involved three focus group interviews (n=32) held at the site of the choir rehearsals over a 10-week period (August-October 2017) where open questions were asked about the experience of singing in the choir. The first group consisted of cancer patients and non-patients (staff, carers and bereaved), the second of non-patients only (staff, carers and bereaved) and the third of patients only (current patients and survivors). One participant did not want to contribute to a focus group interview, but did want to participate in the research so had a one-to-one interview. The interviews were all audio-recorded and then transcribed verbatim by a member of the research team.

### Data analysis

Data collection and analysis were carried out simultaneously, a key feature of grounded theory methodology. Analysis followed guidance from Charmaz (2014) whereby initial coding of the focus groups was conducted independently by 2 researchers (KW & TW), followed by team meetings and email discussions with all 3 researchers (DF, KW & TW) to enable collaborative discussion; posing questions and interrogating the data further. The interview guide was adapted each time new data was collected to allow for developing ideas to be questioned, and the analysis procedure was repeated each time new data was collected until saturation had been reached.

## FINDINGS

Four overarching themes emerged from the analysis procedure. See Table 2.

### 1. Building resilience

The participants reported how the choir helped with resilience in relation to their experiences of being affected by cancer. Illustrating this idea, one participant reported;

*"... it helps with things like resilience - because I think you are in a group of people who kinda get it - no matter what... just generally I feel much more open and uplifted... we do sort of light exercises at the beginning, and all of those I think just help to sort of umm strengthen the mental wellbeing."* (Participant from focus group 1)

Furthermore, the theme of resilience was explored through *coping*;

*"It's a wonderful resource when you're feeling a bit stressed... you can actually sort of sing to yourself... it's a very useful skill to have developed to use as a sort of resource of - for managing yourself."* (Participant from focus group 1)

The choir was viewed as a medium to bring people together which seemed to support living with cancer, in addition to helping with 'rehabilitation' (Participant from focus group 1). The choir was also seen to help coping with specific challenges associated with cancer such as isolation, vulnerability, stress, tiredness, uncertainty and dealing with bereavement.

Furthermore, participants reported that there was something particular about *singing* which supported coping; for example, participants mentioned that there was "something about the words" which are "inspiring", "feeling the music" and "growing with the music". As a specific coping tool, participants discussed hearing the songs in their head throughout the week, with one participant describing this as "a song in my heart" (participant from focus group 3).

It seems then that the songs are a resource for these participants to drawn upon throughout the week between rehearsals. Nevertheless, there was one report of an "earworm" which had negative connotations, where a warmup song was described as an "awful song" (participant from focus group 3).

Interrelated to the notion of coping, the choirs also helped with *building confidence*, including defying negative associations of singing from childhood, giving general confidence and empowering participants at a time where confidence had been lost due to being affected by cancer;

*"Just generally giving you more confidence... not just in singing, but in general... that's a benefit."* (Interview participant)

Participants reported that the choir was *part of their life*, commenting that the choir provided "lasting effects" beyond the rehearsal room, prompting wider behavioural change. In relation to confidence, one participant described how she felt more able to give a presentation at work as a consequence of singing in the choir;

*"My Manager asked me if I would do that [a presentation]... he said 'you don't have to' because he realises that, yeah, that's not the kind of thing I do, but I did say, I would try it, and I think that's partly to do with getting more confidence [from the choir]."* (Interview participant)

1  
2  
3 Other examples included gardening, yoga, making others laugh and singing to grandchildren  
4 (Participants from focus groups 1 and 3). Thus, it seems that the effects of the choir went beyond the  
5 rehearsal room and affected participants' lives throughout the week, including encouraging positive  
6 behavioural change.

7  
8 Finally, the choir provided *support for those affected by cancer*, including through enhanced social  
9 networks, group support where people provided support for one another, support derived from the  
10 words of the music, and an unspoken support created by the experience of the choir:

11  
12 *"It's almost like an unspoken thing within the group that everybody understands from a certain*  
13 *perspective... that really helps - to feel there are other people that just get it without saying*  
14 *anything..." (Participant from focus group 1)*

## 15 16 17 **2. Dynamics of the group**

18  
19 The relevance of the group environment noted in the previous theme was explored more in  
20 discussions of the dynamics of the group. Firstly, the choir was seen to provide a *fellowship* with  
21 other people;

22  
23 *"But it's about the fellowship with the other people... It's actually for everyone." (Participant from*  
24 *focus group 3)*

25  
26 *"It's just enjoyable and the comradery and the friendship and everything that goes with it."*  
27 *(Participant from focus group 2)*

28  
29 There was a sense that the choristers felt stronger as a consequence of sharing the choir experience;  
30 an inclusive place to support one another and to create friendships where everyone is united. Linked  
31 to this idea but nuanced from it, participants felt that the choir was also a caring environment;

32  
33 *"I haven't been here for a number of weeks, and I had a phone call from Katey [researcher] to find*  
34 *out how I am, and Nina [choir leader], and I thought that was so lovely that, you know, perhaps Polly*  
35 *over there who I thought might worry about where I was, had got somebody to go to say 'you know,*  
36 *have you heard from Lily at all?' I have to say I was touched by it." (Participant from focus group 3)*

37  
38  
39 *"I've got new friends since I came here. I've now got friends lighting candles for me. I didn't expect*  
40 *that." (Participant from focus group 3)*

41  
42 The participants felt that they had been remembered when they missed rehearsals or were unwell,  
43 aiding the formation of a shared fellowship. Inherent in the notion of this fellowship is the *social*  
44 *aspect of the choir experience*. Participants commented on the importance of the first half an hour of  
45 the rehearsal, dedicated to socialising;

46  
47 *"I like coming and having a cup of tea. I know it sounds really silly little thing, but I've spoken with a*  
48 *friend who is in a local choir and they don't do any of that!" (Participant from focus group 3)*

49  
50 The social context of the choir also led to increased friendship groups both inside and outside of the  
51 rehearsal room.

52  
53 Interestingly, the diversity of the friendship group was also commented on. Although choir is a place  
54 where members "all have something in common" (Participant from focus group 3), it is also a place

1  
2  
3 where “you make the most unlikely friends” (Participant from focus group 3). Thus, choir brings  
4 people together, leading to an *inclusive* experience: welcoming and for people of “all abilities”;

5  
6 *“...everybody's welcome - you make us feel very welcome... whoever was in the choir at the beginning  
7 and whatever - they've welcomed us - and they've looked as if they're....really pleased to see  
8 us!” (Participant from focus group 1).*

9  
10 It was also suggested that due to the commonality of the cancer journey and this shared choir  
11 context, people felt equal. One nurse commented on “seeing everyone come together” (*Participant  
12 from focus group 1*), another member of hospital staff said that the choir was “a good place for me  
13 to be” (*Participant from focus group 1*), and another participant said that it was for anyone, including  
14 those who “work in healthcare” (*Participant from focus group 3*). Accordingly, there was a  
15 recognition and appreciation amongst choristers that the choir is open to all.

16  
17 The group context is part of what makes the choir *supportive*. One participant mentioned that it was  
18 hard coping with loss of choir members, but she felt supported by the group;

19  
20 *“One downside... is losing people... I have taken back strength from the rest of the people here when,  
21 you know, we've gone to a couple of funerals and things.” (Participant from focus group 2).*

22  
23 Another participant felt that some of the lyrics of the music could be emotionally challenging, but  
24 the affection and trust of the group helped to provide support;

25  
26 *“I think people might struggle with it on an individual level but I think if you're in with a big crowd of  
27 people and you can feel the sort of support, yeah and the affection around it - I think much is building  
28 in the choir I think that I think that makes it a lot more tolerable...” (Participant from focus group 2).*

29  
30 Participants also commented on the empathy that they have for one another (*Participant from focus  
31 group 2 and 3*), in addition to noting that the choir provides an “unspoken support” (*Participant from  
32 focus group 1 and 2*) that differed from traditional help, such as support groups.

33  
34 Finally, the dynamics of the group are constantly changing; that is, there is an *organic* nature to the  
35 choir;

36  
37 *“Because of the way the choirs forming and developing, the bonding, then it really is a proper sort of  
38 a group isn't it? [agreement] even if you've got ebb-ebb and flow.” (Participant from focus group 2)*

39  
40 *“I love it! ...it's never static, it's always moving. Just like the music - always moving - like this - and  
41 that's what I really like.” (Participant from focus group 3)*

42  
43 An important feature of the group is that it is fluid; members come and go, people's lives change and  
44 it is constantly developing. However, another component of this is the dichotomy between the choir  
45 as something fleeting “in the moment” (*Participant from focus group 1*) and the idea that members  
46 are “part of something” as if it had permanence (*Participant from focus group 3*). It is this  
47 combination of growing with the choir whilst feeling a member of it that results in this organic  
48 feature to the experience - even though it changes, the identity of the choir remains intact.

49  
50 Characteristic of all of the themes in this category and further illustrating this organic quality, there  
51 was a moment in the third focus group where members were discussing songs that they would like  
52 to sing and they all started singing ‘Gaudete’ together, a song that they had never learned as a  
53 group. This spontaneity shows that there is a dynamism to the group where they can adapt and  
54 work together.



### 3. Psychological dimensions

Participants reported that there were psychological dimensions to the choir experience; for example, they noted that the choir was an *emotional experience*. Several members mentioned this, including that the choir had made them cry. This emotion was described as something 'good';

*"I found it really emotional too... probably in a good way actually... I think it was a nice kind of release."* (Participant from focus group 1)

This emotional experience therefore had a cathartic quality, providing psychological relief whereby participants could "just express" themselves (participant from focus group 3) and "let go" (participants from focus group 1 and 3). Participants were completely immersed in the activity of group singing, resulting in "a kind of mindfulness" (participant from focus group 1).

Complementing this catharsis, the choir was coined a *positive experience* with particular emphasis on it being "uplifting" which was mentioned in all of the focus groups. The positive aspect of the choir was also connected to idea that the choir was fun, enjoyable and a "happy" experience (participant from focus group 1).

Importantly, these positive emotional experiences were also discussed in relation to the physicality of the choir, emphasising the *holistic* nature of it;

*"It was kind of a mixture of sort of that... need for something that was physical, emotional, and... just all of those things... feel quite holistic to me..."* (Participant from focus group 1).

Finally, the choir contributed to *identity formation*: while having cancer may have resulted in a loss of identity, such as from not going to work, the choir helped to rebuild life and create a new sense of self;

*"So where you might have had your work taken away from you, your identity, perhaps stripped a little bit, umm you're not the leader that you know you used to be in the workplace, umm then you know - it gives you something back."* (participant from focus group 1)

Participants also saw the choir as a chance for "me time" (participant from focus group 2), where the members could have time to just be themselves, rather than be characterised by the experience of living with cancer.

### 4. Features of learning

The final overarching theme in this study explores the features of the choir that contribute to it being a learning experience. Firstly, the choir supported attainment of *musical skills*;

*"And you feel so good when you finish a song and it actually sounds alright!"* (Participant from focus group 2)

These skills were cultivated by the members practising the music at home through use of the CDs provided and through performing in public which was described as a rewarding and enjoyable experience. Members reported that the choir was the perfect balance of being both challenging, where they were learning something new, and fun;

1  
2  
3 *"But it's a combination of the friendliness... as though you're learning something [group agreement]*  
4 *that's what is always so good about it... she's really teaching you - but having a good time as well..."*  
5 *(Participant from focus group 2).*

6  
7 As highlighted in this quote, the *choir leader* was discussed as a key component of the choir;

8  
9 *"Our choir leader is I think the key to getting us all together... she's brilliant... I think we've been really*  
10 *lucky."* (Participant from focus group 2)

11  
12 The choir leader was viewed as an anchor, holding everybody together, sustaining the energy of the  
13 experience and someone to look up to, and to learn from.

14  
15 Other aspects of the choir set-up which were described as essential components of it being a  
16 successful experience included the day of the week and the time of the choir, the building(s) where  
17 the choirs took place and the consistency of the choir. These *choir logistics* seemed valuable to  
18 participants as they supported consistency in their lives, in contrast to the cancer experience which  
19 is often unpredictable;

20  
21 *"...literally had 2 weeks off out of 52 of each year... therefore it's providing a form of pastoral care*  
22 *that the hospitals can't do."* (Participant from focus group 3).

23  
24 Finally, the *choice of repertoire* was discussed as an important component of the choir. Generally,  
25 members stated that the repertoire was positive, uplifting, inspirational, and that they liked the  
26 music;

27  
28 *"I've noticed that all of these... are very positive, umm - very...you know - uplifting and the tunes are*  
29 *really you know, again - sort of nice...it's something that makes you feel happy - which I like very*  
30 *much, and I like positive songs."* (Focus group 1)

31  
32 However, there were suggestions that there could be more classical music in one of the focus groups  
33 (3), and there were mixed responses to one particularly emotional song that explicitly discussed  
34 facing up to cancer.

### 35 36 37 **A theory for building resilience**

38  
39 Following initial analyses of the data to produce the themes described, the researchers re-visited the  
40 data, themes and memos created to explore the interrelationships between the data and the  
41 themes to build a model to depict the findings and their relationships to each other. This further  
42 analysis resulted in theory of building resilience (Figure 1).

43  
44 The diagram shows how the perceived resilience created by the choir is underpinned by the  
45 interaction between the experience of the choir - which is influenced by past experiences,  
46 environment and personal traits - and the impact of it, such as musical skills, confidence and  
47 enhanced wellbeing. The extent to which resilience is created is variable dependent on a multiplicity  
48 of factors such as health status, previous experiences, social connections and commitment, but the  
49 model highlights that a combination of these elements resulted in enhanced, subjective resilience  
50 for the participants who took part in this study.

### 51 52 53 **DISCUSSION**

1  
2  
3 The aim of this study was to build an understanding of how the process of group singing impacts  
4 upon those affected by cancer. Results revealed four overarching themes (building resilience for  
5 those affected by cancer, dynamics of the group, psychological dimensions, and features of  
6 learning), with further analysis enabling the creation of a model presenting how building resilience  
7 underpinned the findings. This is the first known study to provide such a model, highlighting the  
8 mechanisms by which singing impacts upon those affected by cancer.  
9

10 The key finding of this study is that group singing appears to contribute to building resilience in  
11 those affected by cancer. A general definition of resilience is the capacity to maintain healthy  
12 psychological and physical wellbeing despite being exposed to adversity (Bonanno, 2004; Stephens,  
13 2017). In light of the psychosocial challenges that can be experienced during cancer, promoting  
14 resilience has been described as a critical element of the psychosocial care for cancer patients, with  
15 suggestions that medical staff should recognise and promote mechanisms of adaption (Molina et al.,  
16 2014). Within cancer care, sense of confidence, self-transcendence of the cancer experience, and  
17 self-esteem have been proposed as key areas to focus on in order to build resilience (Haase, 2004).  
18

19 With this understanding of resilience in mind, the findings of this study support group singing as an  
20 important intervention to build resilience in those affected by cancer. Group singing was seen to  
21 improve self-confidence, transcend the cancer experience through immersion in the activity and  
22 improve self-esteem through acquisition of musical skills via a balance of challenge and fun. One of  
23 the key reasons that the choir could achieve this was also through its specifically *social* nature.  
24 Community support can be harnessed for resilience, assisting in developing individual psychological  
25 and community strengths (Paton & Johnston, 2006; Stephens, 2017). The choir made social  
26 connections through a group context where a fellowship among members was created.  
27  
28

29 The findings of this study also reinforce other theories concerning psychosocial needs. Lugendorf  
30 and colleagues (2007) put forward a three-factor model to suggest that social support, emotional  
31 expression and benefit finding can aid those affected by cancer, including supporting strong immune  
32 response. Choristers expressed emotions in a 'good way', attained social support through new  
33 friendships and an inclusive environment, and they found some form of benefit from their  
34 experiences through learning new skills, enhanced confidence and the enjoyable experience of  
35 singing together. Consequently, the present study suggests that these three factors can contribute  
36 to positive adjustment, including promoting resilience.  
37

38 There are also indications that the results of this study resonate with theories of wellbeing. The  
39 results from this study suggest that the choir might be able to fulfil the three basic psychological  
40 needs of relatedness, competence and autonomy (Ryan & Deci, 2000). Firstly, the participants  
41 commented on the group and social aspects of the choir. The choir also gave a fulfilling experience –  
42 offering a sense of achievement by learning songs together – which could satisfy the need for  
43 competence. This is also supported by previous studies (Gale et al., 2012; Reagon, Gale, Dow, et al.,  
44 2016). Members were also autonomous as they chose to come to choir each week, integrated the  
45 activity into their lives and were self-regulated in their attitude to learning.  
46  
47

48 More generally, this study links to concepts of enhanced wellbeing. In addition to supporting the  
49 components of increased quality of life in previous studies (Gale et al., 2012; Reagon, Gale, Dow, et  
50 al., 2016), it also correlates with notions of hedonic and eudaimonic wellbeing (Tennant et al., 2007).  
51 Happiness and satisfaction can be seen in themes relating to positive experiences, and psychological  
52 functioning and self-realisation are inherent in building resilience and psychological dimensions. This  
53 supports previous research which has shown that instrumental learning in adulthood can provide  
54 both immediate (hedonic) and longer-term (eudaimonic) enhancements to subjective wellbeing  
55  
56  
57  
58  
59

(Perkins & Williamon, 2014), suggesting that there might be shared mechanisms of music across different musical experiences.

The cathartic and holistic nature of the choir experience also correlates with theories of psychological 'flow' (Maslow, 1964), providing activities that are 'oceanic', 'deeply moving' and 'mystical'. These experiences also allow complete focus on the present moment and a feeling of being in control of the environment (Clarke, Dibben, & Pitts, 2010). Singing in the choir was described as cathartic by participants, in addition to being likened to mindfulness which suggests that it enabled members to focus on the present; a finding also reported in other singing studies (Keeler et al., 2015; Livesey, Morrison, Clift, & Camic, 2012). The 'mystical' component of flow may be inherent in the emotional and indescribable features of the choir, likening it to a spiritual or transcendent experience. This suggestion is reinforced by other singing studies (Clift & Hancox, 2001; Dingle, Brander, Ballantyne, & Baker, 2012; Jacob, Guptill, & Sumsion, 2009). Moreover, it is interesting that the choristers admired and trusted their choir leader in a way that resounds with spiritual leadership where a communion is created between the leader and their fellows, whether this be choristers or a congregation (Coleman, 1998).

### **Conclusion**

There is a need to identify interventions which will provide psychosocial support for those affected by cancer, including patients, staff, carers and bereaved. This study has shown that group singing may be a suitable intervention, building resilience in those affected via an interaction between the holistic experience and impact of the choir context.

### **Tables and figures**

Table 1: Demographics of participants who took part in the study, including number of singing sessions attended.

Table 2. Themes and subthemes. Description of overarching themes and subthemes, summarising the process and impact of group singing for people affected by cancer.

Figure 1. Theory of building resilience, showing that the perceived resilience created by the choir is underpinned by the interaction of the experience of the choir and the impact of it.

### **Acknowledgements**

The authors wish to thank Tenovus Cancer Care, the Royal Marsden NHS Foundation Trust, in addition to the choir members who took part in the study. We also wish to acknowledge The Royal Marsden Cancer Charity who funded TW's time and the infrastructure support of the Royal Marsden/ Institute of Cancer Research Biomedical Research Centre.

### **Contributors**

The research team collaboratively designed the study. TW and DF led on the supervision of the project. KW led on the data collection with support and guidance from DF and TW. TW and KW conducted independent analysis which was discussed at team meetings, resulting in the creation of the model presented, drawn by KW. KW produced the draft of the report which was refined following detailed input from TW and DF.

### **Funding**

This research was supported by Tenovus Cancer Care.

### **Competing interests**

None declared.

**Ethical approval**

The NHS Research Ethics Service approved the study.

**REFERENCES**

- Adler, N. E., Page, A. E., & Setting, I. of M. (US) C. on P. S. to C. P. in a C. (2008). *The Psychosocial Needs of Cancer Patients*. National Academies Press (US).
- Agaibi, C. E., & Wilson, J. P. (2005). Trauma, PTSD, and Resilience. *Trauma, Violence, & Abuse*, 6(3), 195–216. <http://doi.org/10.1177/1524838005277438>
- American Psychological Association. (2017). The Road to Resilience. Retrieved December 12, 2017, from <http://www.apa.org/helpcenter/road-resilience.aspx>
- Bonanno, G. A. (2004). Loss, Trauma, and Human Resilience: Have We Underestimated the Human Capacity to Thrive After Extremely Aversive Events? *American Psychologist*, 59(1), 20–28. <http://doi.org/10.1037/0003-066X.59.1.20>
- Boyle, D. A. (2006). Survivorship. *Clinical Journal of Oncology Nursing*, 10(3). Retrieved from <file:///C:/Users/user/Downloads/B8V51830P5P1M2P2.pdf>
- Bui, L. L., Last, L., Bradley, H., Law, C. H. L., Maier, B.-A., & Smith, A. J. (2002). Interest and participation in support group programs among patients with colorectal cancer. *Cancer Nursing*, 25(2), 150–7. Retrieved from <http://www.ncbi.nlm.nih.gov/pubmed/11984103>
- Catalan, J., Burgess, A., Pergami, A., Hulme, N., Gazzard, B., & Phillips, R. (1996). The psychological impact on staff of caring for people with serious diseases: The case of HIV infection and oncology. *Journal of Psychosomatic Research*, 40(4), 425–435. [http://doi.org/10.1016/0022-3999\(95\)00527-7](http://doi.org/10.1016/0022-3999(95)00527-7)
- Charmaz, K. (2014). *Constructing grounded theory*. Sage.
- Clarke, E. F., Dibben, N., & Pitts, S. (2010). *Music and mind in everyday life*. Oxford University Press.
- Clift, S. M., & Hancox, G. (2001). The perceived benefits of singing: findings from preliminary surveys of a university college choral society. *The Journal of the Royal Society for the Promotion of Health*, 121(4), 248–56. Retrieved from <http://www.ncbi.nlm.nih.gov/pubmed/11811096>
- Coleman, E. J. (1998). *Creativity and spirituality : bonds between art and religion*. State University of New York Press. Retrieved from [https://books.google.co.uk/books?hl=en&lr=&id=MKOERo1EEWsC&oi=fnd&pg=PR9&dq=religion+creativity&ots=M0DEM381sp&sig=cMHakmZUWu3o-\\_0s1GvwwOvSBjw#v=onepage&q=leader&f=false](https://books.google.co.uk/books?hl=en&lr=&id=MKOERo1EEWsC&oi=fnd&pg=PR9&dq=religion+creativity&ots=M0DEM381sp&sig=cMHakmZUWu3o-_0s1GvwwOvSBjw#v=onepage&q=leader&f=false)
- Corbin, J. M., & Strauss, A. L. (2015). *Basics of qualitative research : techniques and procedures for developing grounded theory*. Retrieved from <https://us.sagepub.com/en-us/nam/basics-of-qualitative-research/book235578>
- Council, I. of M. and N. R. (2005). *From Cancer Patient to Cancer Survivor: Lost in Transition*.

- 1  
2  
3 Dingle, G. a., Brander, C., Ballantyne, J., & Baker, F. a. (2012). "To be heard": The social and mental  
4 health benefits of choir singing for disadvantaged adults. *Psychology of Music*, 41(3), 405–421.  
5 <http://doi.org/10.1177/0305735611430081>  
6
- 7 Gale, N., Enright, S., Reagon, C., Lewis, I., & van Deursen, R. (2012). A pilot investigation of quality of  
8 life and lung function following choral singing in cancer survivors and their carers.  
9 *Ecancermedicalscience*, 6, 261. <http://doi.org/10.3332/ecancer.2012.261>  
10
- 11 Guveli, H., Anuk, D., Oflaz, S., Guveli, M. E., Yildirim, N. K., Ozkan, M., & Ozkan, S. (2015). Oncology  
12 staff: burnout, job satisfaction and coping with stress. *Psycho-Oncology*, 24(8), 926–931.  
13 <http://doi.org/10.1002/pon.3743>  
14
- 15 Haase, J. E. (2004). The Adolescent Resilience Model as a Guide to Interventions. *Journal of Pediatric*  
16 *Oncology Nursing*, 21(5), 289–299. <http://doi.org/10.1177/1043454204267922>  
17
- 18 Hodges, L. J., Humphris, G. M., & Macfarlane, G. (2005). A meta-analytic investigation of the  
19 relationship between the psychological distress of cancer patients and their carers. *Social*  
20 *Science & Medicine (1982)*, 60(1), 1–12. <http://doi.org/10.1016/j.socscimed.2004.04.018>  
21
- 22 Irwin, M. R., Olmstead, R. E., Ganz, P. A., & Haque, R. (2013). Sleep disturbance, inflammation and  
23 depression risk in cancer survivors. *Brain, Behavior, and Immunity*, 30 Suppl, S58–67.  
24 <http://doi.org/10.1016/j.bbi.2012.05.002>  
25
- 26 Isikhan, V., Comez, T., & Zafer Danis, M. (2004). Job stress and coping strategies in health care  
27 professionals working with cancer patients. *European Journal of Oncology Nursing*, 8(3), 234–  
28 244. <http://doi.org/10.1016/j.ejon.2003.11.004>  
29
- 30 Jacob, C., Guptill, C., & Sumsion, T. (2009). Motivation for continuing involvement in a leisure-based  
31 choir: The lived experiences of university choir members. *Journal of Occupational Science*,  
32 16(3), 187–193. <http://doi.org/10.1080/14427591.2009.9686661>  
33
- 34 Keeler, J. R., Roth, E. A., Neuser, B. L., Spitsbergen, J. M., Waters, D. J. M., & Vianney, J.-M. (2015).  
35 The neurochemistry and social flow of singing: bonding and oxytocin. *Frontiers in Human*  
36 *Neuroscience*, 9, 518. <http://doi.org/10.3389/fnhum.2015.00518>  
37
- 38 Livesey, L., Morrison, I., Clift, S., & Camic, P. (2012). Benefits of choral singing for social and mental  
39 wellbeing: qualitative findings from a cross-national survey of choir members. *Journal of Public*  
40 *Mental Health*, 11(1), 10–26. <http://doi.org/10.1108/17465721211207275>  
41
- 42 Lutgendorf, S. K., Costanzo, E. S., & Siegel, S. D. (2007). Chapter 41 - Psychosocial Influences in  
43 Oncology: An Expanded Model of Biobehavioral Mechanisms. In R. Ader (Ed.),  
44 *Psychoneuroimmunology (Fourth Edition)* (pp. 869–895). Burlington: Academic Press.  
45
- 46 Macmillan Cancer Care. (2009). "It's no life" Living with the long-term effects of cancer.  
47
- 48 Macmillan Cancer Support. (2006). *Worried sick: the emotional impact of cancer*. London.  
49
- 50 Medisauskaite, A., & Kamau, C. (2017). Prevalence of oncologists in distress: Systematic review and  
51 meta-analysis. *Psycho-Oncology*, 26(11), 1732–1740. <http://doi.org/10.1002/pon.4382>  
52
- 53  
54  
55  
56  
57  
58  
59

- 1  
2  
3 Merckaert, I., Libert, Y., Messin, S., Milani, M., Slachmuylder, J.-L., & Razavi, D. (2010). Cancer  
4 patients' desire for psychological support: prevalence and implications for screening patients'  
5 psychological needs. *Psycho-Oncology*, *19*(2), 141–149. <http://doi.org/10.1002/pon.1568>  
6
- 7 Middleton, R. (2014). Meeting the psychological care needs of patients with cancer. *Art & Science*,  
8 *28*(21), 39–45. Retrieved from  
9 <http://journals.rcni.com/doi/pdfplus/10.7748/ns2014.01.28.21.39.e8149>  
10
- 11 Molina, Y., Yi, J. C., Martinez-Gutierrez, J., Reding, K. W., Yi-Frazier, J. P., & Rosenberg, A. R. (2014).  
12 Resilience among patients across the cancer continuum: diverse perspectives. *Clinical Journal*  
13 *of Oncology Nursing*, *18*(1), 93–101. <http://doi.org/10.1188/14.CJON.93-101>  
14
- 15 Northouse, L. L., Katapodi, M. C., Schafenacker, A. M., & Weiss, D. (2012). The impact of caregiving  
16 on the psychological well-being of family caregivers and cancer patients. *Seminars in Oncology*  
17 *Nursing*, *28*(4), 236–245. <http://doi.org/10.1016/j.soncn.2012.09.006>  
18
- 19 Pascoe, S., Edelman, S., & Kidman, A. (2000). Prevalence of Psychological Distress and Use of Support  
20 Services by Cancer Patients at Sydney Hospitals. *Australian & New Zealand Journal of*  
21 *Psychiatry*, *34*(5), 785–791. <http://doi.org/10.1080/j.1440-1614.2000.00817.x>  
22
- 23 Paton, D., & Johnston, D. M. (David M. (2006). *Disaster resilience : an integrated approach*. Charles C  
24 Thomas.  
25
- 26 Perkins, R., & Williamon, A. (2014). Learning to make music in older adulthood: A mixed-methods  
27 exploration of impacts on wellbeing. *Psychology of Music*, *42*(4), 550–567.  
28 <http://doi.org/10.1177/0305735613483668>  
29
- 30 Polsky, D., Doshi, J. A., Marcus, S., Oslin, D., Rothbard, A., Thomas, N., & Thompson, C. L. (2005).  
31 Long-term risk for depressive symptoms after a medical diagnosis. *Archives of Internal*  
32 *Medicine*, *165*(11), 1260–1266. <http://doi.org/10.1001/archinte.165.11.1260>  
33
- 34 Reagon, C., Gale, N., Dow, R., Lewis, I., & van Deursen, R. (2016). Choir singing and health status in  
35 people affected by cancer. *European Journal of Cancer Care*, 1–10.  
36 <http://doi.org/10.1111/ecc.12568>  
37
- 38 Reagon, C., Gale, N., Enright, S., Mann, M., & van Deursen, R. (2016). A mixed-method systematic  
39 review to investigate the effect of group singing on health related quality of life.  
40 *Complementary Therapies in Medicine*, *27*, 1–11. <http://doi.org/10.1016/j.ctim.2016.03.017>  
41
- 42 Ryan, R. M., & Deci, E. L. (2000). Self-Determination Theory and the Facilitation of Intrinsic  
43 Motivation, Social Development, and Well-Being. *American Psychologist*, *55*(1), 68–78.  
44
- 45 Sautier, L., Mehnert, A., Höcker, A., & Schilling, G. (2014). Participation in patient support groups  
46 among cancer survivors: do psychosocial and medical factors have an impact? *European*  
47 *Journal of Cancer Care*, *23*(1), 140–148. <http://doi.org/10.1111/ecc.12122>  
48
- 49 Schag, C. A., Ganz, P. A., Polinsky, M. L., Fred, C., Hirji, K., & Petersen, L. (1993). Characteristics of  
50 women at risk for psychosocial distress in the year after breast cancer. *Journal of Clinical*  
51 *Oncology*, *11*(4), 783–793.  
52  
53  
54  
55  
56  
57  
58  
59  
60

- 1  
2  
3 Stanton, A. L., Danoff-Burg, S., Cameron, C. L., Bishop, M., Collins, C. A., Kirk, S. B., ... Twillman, R.  
4 (2000). Emotionally expressive coping predicts psychological and physical adjustment to breast  
5 cancer. *Journal of Consulting and Clinical Psychology*, 68(5), 875–82. Retrieved from  
6 <http://www.ncbi.nlm.nih.gov/pubmed/11068973>  
7
- 8 Stephens, C. (2017). An Integrated Model for Understanding and Developing Resilience in the Face of  
9 Adverse Events. *JOURNAL OF PACIFIC RIM PSYCHOLOGY*, 3(1), 20–26.  
10 <http://doi.org/10.1375/prp.3.1.20>  
11
- 12 Stewart, B. W., & Wild, C. P. (2014). *WHO | World Cancer Report 2014*. WHO.
- 14 Tennant, R. ., Hiller, L., Fishwick, R., Platt, S., Joseph, S., Weich, S., ... Stewart-Brown, S. (2007). The  
15 Warwick-Edinburgh Mental Well-being Scale (WEMWBS): development and UK validation.  
16 *Health and Quality of Life Outcomes*, 5(63). Retrieved from  
17 <http://hqlo.biomedcentral.com/articles/10.1186/1477-7525-5-63>  
18  
19
- 20 Thalén-Lindström, A., Glimelius, B., & Johansson, B. (2017). Development of anxiety, depression and  
21 health-related quality of life in oncology patients without initial symptoms according to the  
22 Hospital Anxiety and Depression Scale – a comparative study. *Acta Oncologica*, 56(8), 1094–  
23 1102. <http://doi.org/10.1080/0284186X.2017.1305124>  
24
- 25 Williams, A.-L., & McCorkle, R. (2011). Cancer family caregivers during the palliative, hospice, and  
26 bereavement phases: A review of the descriptive psychosocial literature. *Palliative and*  
27 *Supportive Care*, 9(03), 315–325. <http://doi.org/10.1017/S1478951511000265>  
28  
29
- 30 World Health Organisation. (2017). *WHO | Cancer*.  
31  
32  
33  
34  
35  
36  
37  
38  
39  
40  
41  
42  
43  
44  
45  
46  
47  
48  
49  
50  
51  
52  
53  
54  
55  
56  
57  
58  
59  
60



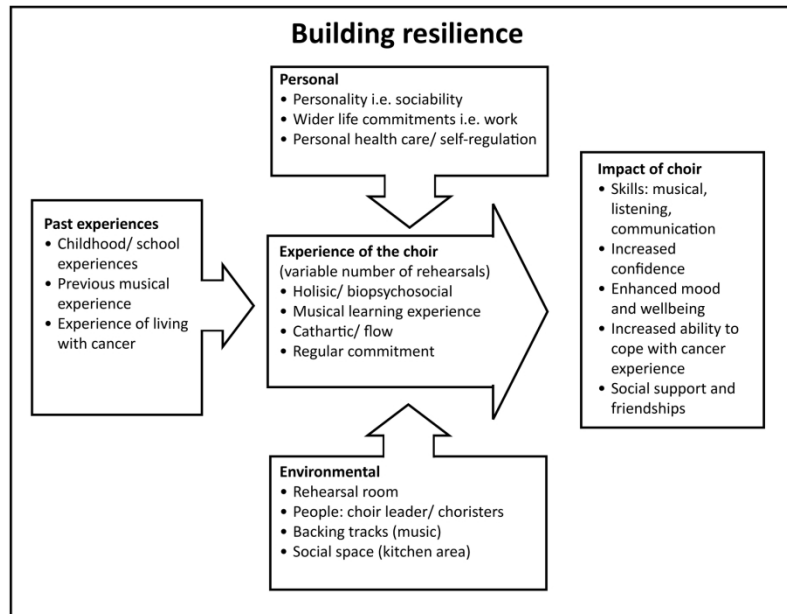

Figure 1. Theory of building resilience, showing that the perceived resilience created by the choir is underpinned by the interaction of the experience of the choir and the impact of it.

209x148mm (300 x 300 DPI)

**Table 2. Description of overarching themes and subthemes, summarising the process and impact of group singing for people affected by cancer.**

| Theme                                                     | Subtheme                                                                                                                                         | Description                                                                                                                                                                                                                                                                                                                                                                                                                                                                                               |
|-----------------------------------------------------------|--------------------------------------------------------------------------------------------------------------------------------------------------|-----------------------------------------------------------------------------------------------------------------------------------------------------------------------------------------------------------------------------------------------------------------------------------------------------------------------------------------------------------------------------------------------------------------------------------------------------------------------------------------------------------|
| <b>1. Building resilience in those affected by cancer</b> | <b>1.1 Coping</b><br><b>1.2 Building confidence</b><br><b>1.3 Part of life</b><br><br><b>1.4 Support</b>                                         | <p>Choir supports coping with cancer and its effects.</p> <p>Choir builds confidence and empowers those living with cancer.</p> <p>Choir has “lasting effects” beyond the rehearsal itself, providing wider behavioural and social change.</p> <p>Choir provides support for those living with cancer.</p>                                                                                                                                                                                                |
| <b>2. Dynamics of the group</b>                           | <b>2.1 A fellowship</b><br><b>2.2 Social experience</b><br><br><b>2.3 Inclusive</b><br><b>2.4 Group support [unspoken]</b><br><b>2.5 Organic</b> | <p>Choir provides a “fellowship with other people”, and a caring network.</p> <p>Choir is a social experience that creates friendship and provides social support.</p> <p>Choir is inclusive and open to all.</p> <p>Choir provides a form of “pastoral”, group support that is often “unspoken”</p> <p>Choir grows organically and is “never static. It's always moving, just like the music.”</p>                                                                                                       |
| <b>3. Psychological dimensions</b>                        | <b>3.1 Emotional</b><br><br><b>3.2 Positive experience</b><br><br><b>3.3. Holistic</b><br><br><b>3.4 Identity formation</b>                      | <p>Choir impacts upon mood and provides an experience that is “emotional in a good way”.</p> <p>Choir is an uplifting and positive experience that is fun, enjoyable and a “nice kind of release”.</p> <p>Choir activates the whole body, connecting the psychological and the physical.</p> <p>Choir provides an opportunity to stand there “as me” and gives “me time”.</p>                                                                                                                             |
| <b>4 Features of learning</b>                             | <b>4.1 Musical skills</b><br><br><b>4.2 Choir leader</b><br><br><b>4.3 Choir logistics</b><br><b>4.4 Choice of repertoire</b>                    | <p>Choir members felt that they attained musical skills via a balance of challenging and fun.</p> <p>The choir leader is someone inspirational who guides, is positive and contributes to improved wellbeing.</p> <p>Choir takes place at a good time in the week and the resources are good.</p> <p>There were mixed responses to repertoire with, on the whole, it being viewed as positive and “uplifting” but with some disagreements over ‘Sing for Life’ and a desire for more Classical music.</p> |

# Reporting checklist for qualitative study.

Based on the SRQR guidelines.

## Instructions to authors

Complete this checklist by entering the page numbers from your manuscript where readers will find each of the items listed below.

Your article may not currently address all the items on the checklist. Please modify your text to include the missing information. If you are certain that an item does not apply, please write "n/a" and provide a short explanation.

Upload your completed checklist as an extra file when you submit to a journal.

In your methods section, say that you used the SRQR reporting guidelines, and cite them as:

O'Brien BC, Harris IB, Beckman TJ, Reed DA, Cook DA. Standards for reporting qualitative research: a synthesis of recommendations. *Acad Med.* 2014;89(9):1245-1251.

|                                            | Reporting Item                                                                                                                                                                                                                          | Page Number |
|--------------------------------------------|-----------------------------------------------------------------------------------------------------------------------------------------------------------------------------------------------------------------------------------------|-------------|
|                                            | #1 Concise description of the nature and topic of the study identifying the study as qualitative or indicating the approach (e.g. ethnography, grounded theory) or data collection methods (e.g. interview, focus group) is recommended | 1           |
|                                            | #2 Summary of the key elements of the study using the abstract format of the intended publication; typically includes background, purpose, methods, results and conclusions                                                             | 1           |
| Problem formulation                        | #3 Description and significance of the problem / phenomenon studied: review of relevant theory and empirical work; problem statement                                                                                                    | 1-2         |
| Purpose or research question               | #4 Purpose of the study and specific objectives or questions                                                                                                                                                                            | 1           |
| Qualitative approach and research paradigm | #5 Qualitative approach (e.g. ethnography, grounded theory, case study, phenomenology, narrative research) and                                                                                                                          | 2           |

guiding theory if appropriate; identifying the research paradigm (e.g. postpositivist, constructivist / interpretivist) is also recommended; rationale. The rationale should briefly discuss the justification for choosing that theory, approach, method or technique rather than other options available; the assumptions and limitations implicit in those choices and how those choices influence study conclusions and transferability. As appropriate the rationale for several items might be discussed together.

|    |                           |     |                                                              |       |
|----|---------------------------|-----|--------------------------------------------------------------|-------|
| 1  |                           |     |                                                              |       |
| 2  |                           |     |                                                              |       |
| 3  |                           |     |                                                              |       |
| 4  |                           |     |                                                              |       |
| 5  |                           |     |                                                              |       |
| 6  |                           |     |                                                              |       |
| 7  |                           |     |                                                              |       |
| 8  |                           |     |                                                              |       |
| 9  |                           |     |                                                              |       |
| 10 |                           |     |                                                              |       |
| 11 |                           |     |                                                              |       |
| 12 |                           |     |                                                              |       |
| 13 |                           |     |                                                              |       |
| 14 | Researcher                | #6  | Researchers' characteristics that may influence the          | 3     |
| 15 | characteristics and       |     | research, including personal attributes, qualifications /    |       |
| 16 | reflexivity               |     | experience, relationship with participants, assumptions      |       |
| 17 |                           |     | and / or presuppositions; potential or actual interaction    |       |
| 18 |                           |     | between researchers' characteristics and the research        |       |
| 19 |                           |     | questions, approach, methods, results and / or               |       |
| 20 |                           |     | transferability                                              |       |
| 21 |                           |     |                                                              |       |
| 22 |                           |     |                                                              |       |
| 23 |                           |     |                                                              |       |
| 24 |                           |     |                                                              |       |
| 25 | Context                   | #7  | Setting / site and salient contextual factors; rationale     | 2-3   |
| 26 |                           |     |                                                              |       |
| 27 |                           |     |                                                              |       |
| 28 | Sampling strategy         | #8  | How and why research participants, documents, or             | 2-3   |
| 29 |                           |     | events were selected; criteria for deciding when no          |       |
| 30 |                           |     | further sampling was necessary (e.g. sampling                |       |
| 31 |                           |     | saturation); rationale                                       |       |
| 32 |                           |     |                                                              |       |
| 33 |                           |     |                                                              |       |
| 34 |                           |     |                                                              |       |
| 35 | Ethical issues pertaining | #9  | Documentation of approval by an appropriate ethics           | 3, 10 |
| 36 | to human subjects         |     | review board and participant consent, or explanation for     |       |
| 37 |                           |     | lack thereof; other confidentiality and data security issues |       |
| 38 |                           |     |                                                              |       |
| 39 |                           |     |                                                              |       |
| 40 | Data collection methods   | #10 | Types of data collected; details of data collection          | 3     |
| 41 |                           |     | procedures including (as appropriate) start and stop         |       |
| 42 |                           |     | dates of data collection and analysis, iterative process,    |       |
| 43 |                           |     | triangulation of sources / methods, and modification of      |       |
| 44 |                           |     | procedures in response to evolving study findings;           |       |
| 45 |                           |     | rationale                                                    |       |
| 46 |                           |     |                                                              |       |
| 47 |                           |     |                                                              |       |
| 48 |                           |     |                                                              |       |
| 49 |                           |     |                                                              |       |
| 50 | Data collection           | #11 | Description of instruments (e.g. interview guides,           | 3     |
| 51 | instruments and           |     | questionnaires) and devices (e.g. audio recorders) used      |       |
| 52 | technologies              |     | for data collection; if / how the instruments(s) changed     |       |
| 53 |                           |     | over the course of the study                                 |       |
| 54 |                           |     |                                                              |       |
| 55 |                           |     |                                                              |       |
| 56 |                           |     |                                                              |       |
| 57 | Units of study            | #12 | Number and relevant characteristics of participants,         | 1,3   |
| 58 |                           |     | documents, or events included in the study; level of         |       |
| 59 |                           |     |                                                              |       |
| 60 |                           |     |                                                              |       |

|    |                                                                                              |                                                                                                                                                                                                                                                                                                              |      |
|----|----------------------------------------------------------------------------------------------|--------------------------------------------------------------------------------------------------------------------------------------------------------------------------------------------------------------------------------------------------------------------------------------------------------------|------|
|    |                                                                                              | participation (could be reported in results)                                                                                                                                                                                                                                                                 |      |
| 1  |                                                                                              |                                                                                                                                                                                                                                                                                                              |      |
| 2  |                                                                                              |                                                                                                                                                                                                                                                                                                              |      |
| 3  | Data processing                                                                              | #13 Methods for processing data prior to and during analysis, including transcription, data entry, data management and security, verification of data integrity, data coding, and anonymisation / deidentification of excerpts                                                                               | 3    |
| 4  |                                                                                              |                                                                                                                                                                                                                                                                                                              |      |
| 5  |                                                                                              |                                                                                                                                                                                                                                                                                                              |      |
| 6  |                                                                                              |                                                                                                                                                                                                                                                                                                              |      |
| 7  |                                                                                              |                                                                                                                                                                                                                                                                                                              |      |
| 8  |                                                                                              |                                                                                                                                                                                                                                                                                                              |      |
| 9  | Data analysis                                                                                | #14 Process by which inferences, themes, etc. were identified and developed, including the researchers involved in data analysis; usually references a specific paradigm or approach; rationale                                                                                                              | 3    |
| 10 |                                                                                              |                                                                                                                                                                                                                                                                                                              |      |
| 11 |                                                                                              |                                                                                                                                                                                                                                                                                                              |      |
| 12 |                                                                                              |                                                                                                                                                                                                                                                                                                              |      |
| 13 |                                                                                              |                                                                                                                                                                                                                                                                                                              |      |
| 14 |                                                                                              |                                                                                                                                                                                                                                                                                                              |      |
| 15 |                                                                                              |                                                                                                                                                                                                                                                                                                              |      |
| 16 | Techniques to enhance trustworthiness                                                        | #15 Techniques to enhance trustworthiness and credibility of data analysis (e.g. member checking, audit trail, triangulation); rationale                                                                                                                                                                     | 3    |
| 17 |                                                                                              |                                                                                                                                                                                                                                                                                                              |      |
| 18 |                                                                                              |                                                                                                                                                                                                                                                                                                              |      |
| 19 |                                                                                              |                                                                                                                                                                                                                                                                                                              |      |
| 20 |                                                                                              |                                                                                                                                                                                                                                                                                                              |      |
| 21 | Syntheses and interpretation                                                                 | #16 Main findings (e.g. interpretations, inferences, and themes); might include development of a theory or model, or integration with prior research or theory                                                                                                                                               | 3-8  |
| 22 |                                                                                              |                                                                                                                                                                                                                                                                                                              |      |
| 23 |                                                                                              |                                                                                                                                                                                                                                                                                                              |      |
| 24 |                                                                                              |                                                                                                                                                                                                                                                                                                              |      |
| 25 |                                                                                              |                                                                                                                                                                                                                                                                                                              |      |
| 26 |                                                                                              |                                                                                                                                                                                                                                                                                                              |      |
| 27 | Links to empirical data                                                                      | #17 Evidence (e.g. quotes, field notes, text excerpts, photographs) to substantiate analytic findings                                                                                                                                                                                                        | 3-8  |
| 28 |                                                                                              |                                                                                                                                                                                                                                                                                                              |      |
| 29 |                                                                                              |                                                                                                                                                                                                                                                                                                              |      |
| 30 |                                                                                              |                                                                                                                                                                                                                                                                                                              |      |
| 31 | Intergration with prior work, implications, transferability and contribution(s) to the field | #18 Short summary of main findings; explanation of how findings and conclusions connect to, support, elaborate on, or challenge conclusions of earlier scholarship; discussion of scope of application / generalizability; identification of unique contributions(s) to scholarship in a discipline or field | 8-10 |
| 32 |                                                                                              |                                                                                                                                                                                                                                                                                                              |      |
| 33 |                                                                                              |                                                                                                                                                                                                                                                                                                              |      |
| 34 |                                                                                              |                                                                                                                                                                                                                                                                                                              |      |
| 35 |                                                                                              |                                                                                                                                                                                                                                                                                                              |      |
| 36 |                                                                                              |                                                                                                                                                                                                                                                                                                              |      |
| 37 |                                                                                              |                                                                                                                                                                                                                                                                                                              |      |
| 38 |                                                                                              |                                                                                                                                                                                                                                                                                                              |      |
| 39 |                                                                                              |                                                                                                                                                                                                                                                                                                              |      |
| 40 | Limitations                                                                                  | #19 Trustworthiness and limitations of findings                                                                                                                                                                                                                                                              | 1    |
| 41 |                                                                                              |                                                                                                                                                                                                                                                                                                              |      |
| 42 |                                                                                              |                                                                                                                                                                                                                                                                                                              |      |
| 43 | Conflicts of interest                                                                        | #20 Potential sources of influence of perceived influence on study conduct and conclusions; how these were managed                                                                                                                                                                                           | 10   |
| 44 |                                                                                              |                                                                                                                                                                                                                                                                                                              |      |
| 45 |                                                                                              |                                                                                                                                                                                                                                                                                                              |      |
| 46 |                                                                                              |                                                                                                                                                                                                                                                                                                              |      |
| 47 |                                                                                              |                                                                                                                                                                                                                                                                                                              |      |
| 48 | Funding                                                                                      | #21 Sources of funding and other support; role of funders in data collection, interpretation and reporting                                                                                                                                                                                                   | 10   |
| 49 |                                                                                              |                                                                                                                                                                                                                                                                                                              |      |
| 50 |                                                                                              |                                                                                                                                                                                                                                                                                                              |      |
| 51 |                                                                                              |                                                                                                                                                                                                                                                                                                              |      |

The SRQR checklist is distributed with permission of Wolters Kluwer © 2014 by the Association of American Medical Colleges. This checklist was completed on 28. March 2018 using <http://www.goodreports.org/>, a tool made by the [EQUATOR Network](#) in collaboration with [Penelope.ai](#)

# BMJ Open

## How does the process of group singing impact upon people affected by cancer? A grounded theory study

|                                 |                                                                                                                                                                                                                                                                                                                                                           |
|---------------------------------|-----------------------------------------------------------------------------------------------------------------------------------------------------------------------------------------------------------------------------------------------------------------------------------------------------------------------------------------------------------|
| Journal:                        | <i>BMJ Open</i>                                                                                                                                                                                                                                                                                                                                           |
| Manuscript ID                   | bmjopen-2018-023261.R1                                                                                                                                                                                                                                                                                                                                    |
| Article Type:                   | Research                                                                                                                                                                                                                                                                                                                                                  |
| Date Submitted by the Author:   | 09-Aug-2018                                                                                                                                                                                                                                                                                                                                               |
| Complete List of Authors:       | Warran, Katey; The University of Edinburgh, School of Social and Political Science<br>Fancourt, Daisy; University College London Research Department of Epidemiology and Public Health, Department of Behavioural Science and Health<br>Wiseman, Theresa; The Royal Marsden NHS Foundation Trust, ; University of Southampton, Faculty of Health Sciences |
| <b>Primary Subject Heading</b>: | Oncology                                                                                                                                                                                                                                                                                                                                                  |
| Secondary Subject Heading:      | Mental health, Qualitative research                                                                                                                                                                                                                                                                                                                       |
| Keywords:                       | ONCOLOGY, QUALITATIVE RESEARCH, MENTAL HEALTH, Adult oncology < ONCOLOGY, THERAPEUTICS                                                                                                                                                                                                                                                                    |
|                                 |                                                                                                                                                                                                                                                                                                                                                           |

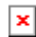

## How does the process of group singing impact upon people affected by cancer? A grounded theory study

Katey Warran<sup>1</sup> Daisy Fancourt<sup>2</sup> Theresa Wiseman<sup>3</sup>

**Objective:** This study aimed to build an understanding of how the process of singing impacts upon those who are affected by cancer, including patients, staff, carers and those who have been bereaved.

**Design:** A qualitative study, informed by a Grounded Theory approach.

**Setting and participants:** Cancer patients, staff, carers and bereaved who had participated for a minimum of 6 weeks in one of two choirs for people affected by cancer.

**Methods:** 31 participants took part in Focus Group Interviews lasting between 45 minutes and an hour, and 1 participant had a face to face interview.

**Findings:** Four overarching themes emerged from the iterative analysis procedure. The overarching themes were: building resilience, social support, psychological dimensions, and process issues. Following further analyses, a theoretical model was created to depict how building resilience underpins the findings.

**Conclusion:** Group singing may be a suitable intervention for building resilience in those affected by cancer via an interaction between the experience and impact of the choir.

### Strengths and limitations of this study

- This is the first grounded theory study to have been conducted to explore the impact of group singing for those affected by with cancer.
- 32 participants took part spanning patients, staff, carers and bereaved, and saturation was reached.
- This study was concerned with people affected by any type of cancer, but it remains for future studies to establish whether singing had a specific bespoke impact for people with different types of cancer.
- This study used focus group and one-to-one interviews to provide in-depth data to understand shared perspectives and individual experiences, but as no participant observations were undertaken, the behaviours of participants during the singing sessions themselves remain unstudied.

## INTRODUCTION

There is growing awareness about the psychosocial challenges faced by cancer patients. Major depression rates are approximately five times higher in cancer patients than the general population, with many cases undiagnosed, and only 30-35% of patients achieving remission from depression [1]. Patients can also experience more generalised worry, such as heightened sense of vulnerability, inability to make plans and a fear for the future, anger, isolation, diminished self-esteem, concerns over body image, mood disturbance, changes in sexual function and changes in relationships with others [2,3]. These symptoms can be aggravated by changes in patients' daily lives, such as reduced or terminated employment and financial stress. Even 10 years after treatment, 54% of cancer survivors still suffer from at least one psychological issue [4].

Furthermore, cancer patients are not the only individuals affected by cancer. Caregivers (whether family or friends) can experience psychosocial challenges commensurate with, or even greater than, those experienced by cancer patients [5]. Caregivers who suffer bereavement are at increased risk for physical and mental morbidity [6]. Healthcare professionals are also distressed due to emotionally demanding work, resulting in reduced career satisfaction, emotional exhaustion, stress and depression [7].

In light of these challenges, studies have shown that 1 in 4 female cancer patients and 1 in 10 male cancer patients desire psychological support. However, frequently people who most need such support are not those who seek it [8], and attendance at conventional support groups is low [9–11].

Although research in this area is still emerging, group singing has been suggested as a suitable intervention for those affected by cancer to support psychosocial needs [12,13]. Just 70 minutes of singing has been found to be associated

<sup>1</sup> School of Social and Political Science, The University of Edinburgh, Edinburgh, UK

<sup>2</sup> University College London, London, UK

<sup>3</sup> The Royal Marsden NHS Foundation Trust, London, UK

Correspondence to: Katey Warran [katey.warran@ed.ac.uk](mailto:katey.warran@ed.ac.uk)

with emotional changes, including reductions in self-rated fear, anger, confusion, sadness, tension, tiredness, anxiety and stress and improvements in energy, happiness, relaxation and social connectedness [14]. Three-month singing interventions for patients with lung cancer have been shown to be associated with improvements in vitality, social functioning and mental health [12], while 6-month singing interventions have been shown to be associated with improvements in vitality, anxiety and overall mental health for carers and people who have been bereaved and with improvements in anxiety for cancer patients [15]. Further qualitative studies have identified improved confidence and self-esteem amongst people affected by cancer who sing in choirs [12] as well as stress relief, friendship and feelings of reward amongst cancer staff [16].

However, despite these few promising studies which suggest that group singing is a valuable support, there has been no attempt to build an evidence base regarding *why* singing may be beneficial for those affected by cancer. One previous study proposed that the main mechanism by which singing can affect quality of life in those affected by cancer is that it provides an uplifting musical experience within a supportive community context [13], but this remains to be explored further. This research gap has been recognised more broadly in the context of other music interventions within health contexts, for example by DeNora and Ansdell [17] who state that current research cannot describe *the processes* by which music effects change. Therefore, the aim of this study is to address this gap in the literature and to build an understanding of how the process of group singing impacts upon those affected by cancer, including patients, staff, carers and those who have been bereaved.

## METHOD

### Study design

A qualitative methodological approach informed by grounded theory was adopted. This systematic strategy entailed an iterative process of analysing data after each data collection period and constantly comparing data with data. This process allowed a theory of singing and cancer to emerge that was *grounded in the data* [18] as each emergent theme was inductively explored and adapted until the end of data collection when saturation had been reached [19]. Focus group interviews were chosen as the primary method as the research question demanded an understanding of *group* singing and therefore shared perspectives.

**TABLE 1: Demographics of participants who took part in the study, including number of singing sessions attended.**

|                                                 |    |
|-------------------------------------------------|----|
| <b>Gender</b>                                   |    |
| Female                                          | 21 |
| Male                                            | 11 |
| <b>Age (Mean)</b>                               | 63 |
| <b>Participant Group</b>                        |    |
| Patient                                         | 20 |
| Staff                                           | 2  |
| Carer                                           | 3  |
| Bereaved                                        | 7  |
| <b>Number Of Choir Sessions Attended (Mean)</b> | 29 |
| <b>Ethnicity</b>                                |    |
| White                                           | 29 |
| Asian                                           | 2  |
| Prefer Not to Say                               | 1  |
| <b>Education</b>                                |    |
| As Level/A-Level                                | 4  |
| O-Level/ GCSE                                   | 6  |
| Vocational Training                             | 3  |
| Undergraduate Degree                            | 9  |
| Postgraduate Degree                             | 10 |

### Participants and procedure

This study was part of a larger 2-year non-randomised controlled investigation into singing for people affected by cancer. There were 3 cohorts recruited: (1) *Cohort A*: patients with stage I-III breast or colorectal cancer up to 24 months post diagnosis, as well as prostate cancer patients on active surveillance; (2) *Cohort B*: hospital staff, people who cared for someone with cancer and those who had lost a family member or somebody they cared for to cancer in the last 3 years; and (3) *Cohort C*: anybody who had been affected by cancer who wanted to sing in a choir. No musical experience was required to join any of the cohorts, but participants could not also be singing in another choir and join the research. The study was approved by the NHS Research Ethics Service, and participants consented for anonymised data to be used and analysed by the research team.

Participants from all three cohorts were invited to join one of two choirs (based on geographical location) or to be assigned to a 'care as usual' group. Joining the choir



involved weekly singing sessions of 60 minutes preceded by 30 minutes of socialising and refreshments for a period of up to 24 weeks. The choirs are led by professional choir leaders and the singing typically starts with a short warmup lasting 5-15 minutes, with the rest of the rehearsal being used to practice contemporary popular music songs. There is no sheet music and no musical experience required, and everyone reads from lyric sheets denoting the choral parts.

For this sub-study, participants who had consented to the larger study and joined the choirs were invited to take part. In accordance with grounded theory, the sample selection after the first group was guided by the data collection: the first focus group was conducted with a mixture of patients and non-patients but to explore whether the themes occurred with patients-only and with non-patients only, two further respective focus groups were held. We invited people to take part in the study if they had been to at least six choir rehearsals and were still a member of the choir at the time the study was being conducted (August-October 2017). This totalled 54 eligible individuals who were invited, of whom 32 took part. (See Table 1 for participant demographics.)

### **Patient and public involvement**

This study was carried out as part of a larger 2-year grant looking at singing for people affected by cancer. Cancer patients, carers and staff took part in focus groups to design the research questions at the start of the grant and approved all study designs and measures. Patients and public also actively took part in recruitment for the study and have helped to disseminate results from other completed phases of the grant.

### **Data collection**

Data collection involved three focus group interviews (n=31) held at the site of the choir rehearsals over a 10-week period (August-October 2017) where open questions were asked about the experience of singing in the choir. The first group consisted of cancer patients and non-patients (staff, carers and bereaved), the second of non-patients only (staff, carers and bereaved) and the third of patients only (current patients and survivors). One participant did not want to contribute to a focus group interview, but did want to participate in the research so had a one-to-one interview. The interviews were all audio-recorded and then transcribed verbatim by a member of the research team.

### **Data analysis**

Data collection and analysis were carried out simultaneously, a key feature of grounded theory methodology. Following guidance from Charmaz [18,20], this involved carrying out line-by-line initial coding, conceptual focused coding, axial coding to consider relationships between codes, compare categories and sub-categories with one another, and theoretical coding to explore and integrate these relationships, as well as creating memos to record emergent ideas. To stay 'close' to the data, analyses was completed by hand as opposed to using software. The coding of the focus groups was conducted independently by 2 researchers (KW & TW), followed by team meetings and email discussions with all 3 researchers (DF, KW & TW) to enable collaborative discussion; posing questions and interrogating the data further and refining themes. The interview guide was adapted each time new data was collected to allow for developing ideas to be questioned, and the analysis procedure was repeated each time new data was collected until saturation had been reached. Saturation was agreed between the research team when data was no longer providing new theoretical insights [20].

## **FINDINGS**

Four overarching themes and sixteen subthemes emerged from the analysis procedure. See Table 2.

### **1. Building resilience**

The participants reported how the choir helped with resilience in relation to their experiences of being affected by cancer. Illustrating this idea, one participant reported;

*"... it helps with things like resilience - because I think you are in a group of people who kinda get it - no matter what... just generally I feel much more open and uplifted... we do sort of light exercises at the beginning, and all of those I think just help to sort of umm strengthen the mental wellbeing."* (Participant from focus group 1)

Resilience and strengthened mental wellbeing may be created by being with a group of people who have a shared experience, in addition to the physical experience of the choir. Furthermore, the theme of resilience was explored through *coping* (subtheme 1.1);

“It’s a wonderful resource when you’re feeling a bit stressed... you can actually sort of sing to yourself... it’s a very useful skill to have developed to use as a sort of resource of – for managing yourself.” (Participant from focus group 1)

The choir was viewed as a medium to bring people together which seemed to support living with cancer, in addition to helping with ‘rehabilitation’ (Participant from focus group 1). The choir was also seen to help coping with specific challenges associated with cancer such as isolation, vulnerability, stress, tiredness, uncertainty and dealing with bereavement.

Furthermore, participants reported that there was something particular about *singing* which supported coping; for example, participants mentioned that there was “something about the words” which are “inspiring”, “feeling the harmonies” and “growing with the music” (participants from focus group 1). As a specific coping tool, participants discussed hearing the songs in their head throughout the week, with one participant describing this as “a song in my heart” (participant from focus group 3).

It seems then that the songs are a resource for these participants to draw upon throughout the week between rehearsals. Nevertheless, there was one report of an “earworm” which had negative connotations, where a warmup song was described as an “awful song” (participant from focus group 3).

Interrelated to the notion of coping, the choirs helped with *building confidence* (subtheme 1.2), including defying negative associations of singing from childhood, giving general confidence and empowering participants at a time where confidence had been lost due to being affected by cancer;

**Table 2. Description of overarching themes and subthemes, summarising the process and impact of group singing for people affected by cancer.**

| THEME                       | Subtheme                     | Description                                                                                               |
|-----------------------------|------------------------------|-----------------------------------------------------------------------------------------------------------|
| 1. BUILDING RESILIENCE      | 1.1 Coping                   | Choir supports coping with cancer and its effects.                                                        |
|                             | 1.2 Building confidence      | Choir builds confidence and empowers members.                                                             |
|                             | 1.3 Part of life             | Choir has “lasting effects” beyond the rehearsal itself, providing wider behavioural and social change.   |
| 2. SOCIAL SUPPORT           | 2.1 Group support [unspoken] | Choir provides a form of “pastoral”, group support that is often “unspoken”.                              |
|                             | 2.2 A fellowship             | Choir provides a “fellowship with other people”, and a caring network.                                    |
|                             | 2.3 Social experience        | Choir is a social experience that creates friendship and provides social support.                         |
|                             | 2.4 Inclusive                | Choir is inclusive and open to all.                                                                       |
|                             | 2.5 Organic                  | Choir grows organically and is “never static.”                                                            |
| 3. PSYCHOLOGICAL DIMENSIONS | 3.1 Emotional                | Choir impacts upon mood and provides an experience that is “emotional in a good way”.                     |
|                             | 3.2 Positive experience      | Choir is an uplifting and positive experience that is fun, enjoyable and a “nice kind of release”.        |
|                             | 3.3. Holistic                | Choir activates the whole body, connecting the psychological and the physical.                            |
|                             | 3.4 Identity formation       | Choir provides an opportunity to stand there “as me” and gives “me time”.                                 |
| 4 PROCESS ISSUES            | 4.1 Musical skills           | Choir members felt that they attained musical skills via a balance of challenging and fun.                |
|                             | 4.2 Choir leader             | The choir leader is someone inspirational who guides, is positive and contributes to improved wellbeing.  |
|                             | 4.3 Choir logistics          | Choir takes place at a good time in the week and the resources are good.                                  |
|                             | 4.4 Choice of repertoire     | There were mixed responses to repertoire with, on the whole, it being viewed as positive and “uplifting”. |

1 *Participant 1: "...at school I was told to mime... I was very sensitive about singing..."*

2 *Participant 2: "I had a similar experience at school... I've joined the choir - it's given me loads of confidence - I can*  
3 *actually sing, I've really surprised myself"* (participants from focus group 1)

4  
5 *"Just generally giving you more confidence... not just in singing, but in general... that's a benefit."* (Interview  
6 participant)

7  
8 It seemed the choir gave confidence to participants in a number of ways, including defying negative associations of  
9 singing from childhood, giving general confidence and empowering participants at a time where confidence had  
10 been lost due to being affected by cancer.

11  
12 Moreover, participants reported that the choir was *part of their life* (subtheme 1.3), commenting that the choir  
13 provided "lasting effects" beyond the rehearsal room, prompting wider behavioural change. In relation to  
14 confidence, one participant described how she felt more able to give a presentation at work as a consequence of  
15 singing in the choir;

16  
17 *"My Manager asked me if I would do that [a presentation]... he said 'you don't have to' because he realises that,*  
18 *yeah, that's not the kind of thing I do, but I did say, I would try it, and I think that's partly to do with getting more*  
19 *confidence [from the choir]."* (Interview participant)

20  
21 Other examples included gardening, yoga, making others laugh and singing to grandchildren (Participants from focus  
22 groups 1 and 3). Thus, it seems that the effects of the choir went beyond the rehearsal room and affected  
23 participants' lives throughout the week, including encouraging positive behavioural change.

## 26 **2. Social support**

27  
28 Interconnected to the notion of resilience and a component of it, the choir provided *group support* (subtheme 2.1)  
29 where people provided support for one another which was, at times, an unspoken support:

30  
31 *"It's almost like an unspoken thing within the group that everybody understands from a certain perspective... that*  
32 *really helps - to feel there are other people that just get it without saying anything..."* (Participant from focus group 1)

33  
34 One participant mentioned that it was hard coping with loss of choir members, but she felt supported by the group;

35  
36 *"One downside... is losing people... I have taken back strength from the rest of the people here."* (Participant from  
37 focus group 2).

38  
39 Another participant felt that some of the lyrics of the music could be emotionally challenging, but the affection and  
40 trust of the group helped to provide support;

41  
42 *"I think people might struggle with it on an individual level but I think if you're in with a big crowd of people and you*  
43 *can feel the sort of support, yeah and the affection around it - I think much is building in the choir I think that I think*  
44 *that makes it a lot more tolerable..."* (Participant from focus group 2).

45  
46 Participants also commented on the empathy that they have for one another (Participant from focus group 2 and 3),  
47 in addition to noting that the "unspoken support" (Participant from focus group 1 and 2) differed from traditional  
48 help, such as support groups.

49  
50 In addition, the choir was seen to provide *a fellowship* with other people (subtheme 2.2);

51  
52 *"But it's about the fellowship with the other people... It's actually for everyone."* (Participant from focus group 3)

53  
54 *"It's just enjoyable and the comradery and the friendship and everything that goes with it."* (Participant from focus  
55 group 2)

1 There was a sense that the choristers felt stronger as a consequence of sharing the choir experience; an inclusive  
2 place to support one another and to create friendships where everyone is united. Linked to this idea but nuanced  
3 from it, participants felt that the choir was also a caring environment;  
4

5 *"I haven't been here for a number of weeks, and I had a phone call from Katey [researcher] to find out how I am, and*  
6 *Nina [choir leader], and I thought that was so lovely that, you know, perhaps Polly over there who I thought might*  
7 *worry about where I was, had got somebody to go to say 'you know, have you heard from Lily at all?' I have to say I*  
8 *was touched by it."* (Participant from focus group 3)  
9

10 *"I've got new friends since I came here. I've now got friends lighting candles for me. I didn't expect that."* (Participant  
11 *from focus group 3)*  
12

13 The participants felt that they had been remembered when they missed rehearsals or were unwell, aiding the  
14 formation of a shared fellowship. Inherent in the notion of this fellowship is the *social aspect of the choir experience*  
15 (subtheme 2.3). Participants commented on the importance of the first half an hour of the rehearsal, dedicated to  
16 socialising;  
17

18 *"I like coming and having a cup of tea. I know it sounds really silly little thing, but I've spoken with a friend who is in a*  
19 *local choir and they don't do any of that!"* (Participant from focus group 3)  
20  
21

22 Interestingly, the diversity of the friendship group was also commented on. Although choir is a place where  
23 members "all have something in common" (Participant from focus group 3), it is also a place where "you make the  
24 most unlikely friends" (Participant from focus group 3). Thus, choir brings people together, leading to an *inclusive*  
25 *experience* (subtheme 2.4): welcoming and for people of "all abilities";  
26

27 *"...everybody's welcome - you make us feel very welcome... whoever was in the choir at the beginning and whatever -*  
28 *they've welcomed us - and they've looked as if they're....really pleased to see us!"* (Participant from focus group 1).  
29

30 *"It's nice to have people - all abilities."* (Participant from focus group 2)  
31  
32

33 It was also suggested that due to the commonality of the cancer journey and this shared choir context, people felt  
34 equal. One nurse commented on "seeing everyone come together" (Participant from focus group 1), another  
35 member of hospital staff said that the choir was "a good place for me to be" (Participant from focus group 1), and  
36 another participant said that it was for anyone, including those who "work in healthcare" (Participant from focus  
37 *group 3*). Accordingly, there was a recognition and appreciation amongst choristers that the choir is open to all.  
38

39 Moving onto the fifth subtheme in this category which reflects on the dynamics of the group, the *organic* nature of  
40 the choir (subtheme 2.5) contributed to a sense of group identity:  
41

42 *"Because of the way the choirs forming and developing, the bonding, then it really is a proper sort of a group isn't it?*  
43 *[agreement] even if you've got ebb-ebb and flow."* (Participant from focus group 2)  
44

45 *"I love it! ...it's never static, it's always moving. Just like the music - always moving - like this - and that's what I really*  
46 *like."* (Participant from focus group 3)  
47

48 This group identity is maintained despite the fact that it is ever changing; members come and go, people's lives  
49 change and it is constantly developing. There is a dichotomy between the choir as something fleeting "in the  
50 moment" (Participant from focus group 1) and the idea that members are "part of something" as if it had  
51 permanence (Participant from focus group 3). It is this combination of growing with the choir whilst feeling a  
52 member of it that results in this organic feature to the experience - even though it changes, there is still a sense of  
53 group support.  
54

55  
56 Characteristic of all of the themes in this category and further illustrating this organic quality, there was a moment in  
57 the third focus group where members were discussing songs that they would like to sing and they all started singing  
58  
59

1 'Gaudete' together, a song that they had never learned as a group. This spontaneity shows that there is a dynamism  
2 to the group where they can adapt and work together.

### 3. Psychological dimensions

4  
5 Participants reported that there were psychological dimensions to the choir experience; for example, they noted  
6 that the choir was an *emotional experience* (subtheme 3.1). Several members mentioned this, including that the  
7 choir had made them cry. This emotion was described as something 'good';

8  
9 *"I found it really emotional too... probably in a good way actually... I think it was a nice kind of release."* (Participant  
10 from focus group 1)

11  
12 This emotional experience therefore had a cathartic quality, providing psychological relief whereby participants  
13 could "just express" themselves (participant from focus group 3) and "let go" (participants from focus group 1 and  
14 3). Participants were completely immersed in the activity of group singing, resulting in "a kind of mindfulness"  
15 (participant from focus group 1).

16  
17 Complementing this catharsis, the choir was coined a *positive experience* (subtheme 3.2) with particular emphasis on  
18 it being "uplifting" which was mentioned in all of the focus groups. The positive aspect of the choir was also  
19 connected to idea that the choir was fun, enjoyable and a "happy" experience (participant from focus group 1).

20  
21 Importantly, these positive emotional experiences were also discussed in relation to the physicality of the choir,  
22 emphasising the *holistic* nature of it (subtheme 3.3);

23  
24 *"It's physical and like you said about the breathing, its physical and its mental and it's emotional"* (participant from  
25 focus group 1). *"It was kind of a mixture of sort of that... need for something that was physical, emotional, and... just  
26 all of those things... feel quite holistic to me..."* (Participant from focus group 1).

27  
28 Finally, the choir contributed to *identity formation* (subtheme 3.4): while having cancer may have resulted in a loss  
29 of identity, such as from not going to work, the choir helped to rebuild life and create a new sense of self;

30  
31 *"So where you might have had your work taken away from you, your identity, perhaps stripped a little bit, umm  
32 you're not the leader that you know you used to be in the workplace, umm then you know - it gives you something  
33 back."* (participant from focus group 1)

34  
35 Participants also saw the choir as a chance for "me time" (participant from focus group 2), where the members could  
36 have time to just be themselves, rather than be characterised by the experience of living with cancer.

### 4. Process issues

37  
38 The final overarching theme in this study explores *process issues*, including addressing what the participants sang  
39 and how rehearsals were organised. Firstly, the choir supported attainment of *musical skills* (subtheme 4.1);

40  
41 *"And you feel so good when you finish a song and it actually sounds alright!"* (Participant from focus group 2)

42  
43 These skills were cultivated by the members practising the music at home through use of the CDs provided and  
44 through performing in public which was described as a rewarding and enjoyable experience. Members reported that  
45 the choir was the perfect balance of being both challenging, where they were learning something new, and fun;

46  
47 *"But it's a combination of the friendliness... as though you're learning something [group agreement] that's what is  
48 always so good about it... she's really teaching you - but having a good time as well..."* (Participant from focus group  
49 2).

50  
51 As highlighted in this quote, the *choir leader* (subtheme 4.2) was discussed as a key component of the choir;

1  
2  
3  
4  
5  
6  
7  
8  
9  
10  
11  
12  
13  
14  
15  
16  
17  
18  
19  
20  
21  
22  
23  
24  
25  
26  
27  
28  
29  
30  
31  
32  
33  
34  
35  
36  
37  
38  
39  
40  
41  
42  
43  
44  
45  
46  
47  
48  
49  
50  
51  
52  
53  
54  
55  
56  
57  
58  
59  
60

*"Our choir leader is I think the key to getting us all together... she's brilliant... I think we've been really lucky."*  
(Participant from focus group 2)

*"The leadership we've had... from our choir leader... it's a marvel"* (participant from focus group 3)

The choir leader was viewed as an anchor, holding everybody together, sustaining the energy of the experience and someone to look up to, and to learn from.

Other aspects of the choir set-up which were viewed as essential components of it being a successful experience included the day of the week and the time of the choir, the building(s) where the choirs took place which were described as "lovely" and "like home" (participant from focus group 2), and the consistency of the choir. These *choir logistics* (subtheme 4.3) seemed valuable to participants as they supported regularity in their lives, in contrast to the cancer experience which is often unpredictable;

*"...literally had 2 weeks off out of 52 of each year... therefore it's providing a form of pastoral care that the hospitals can't do."* (Participant from focus group 3).

Finally, the *choice of repertoire* (subtheme 4.4) was discussed as an important component of the choir. Generally, members stated that the repertoire was positive, uplifting, inspirational, and that they liked the music;

*"I've noticed that all of these... are very positive, umm - very...you know - uplifting and the tunes are really you know, again - sort of nice...it's something that makes you feel happy - which I like very much, and I like positive songs."*  
(Focus group 1)

However, there were suggestions that there could be more classical music in one of the focus groups (3), and there were mixed responses to one particularly emotional song that explicitly discussed facing up to cancer.

### **A theory for building resilience**

Following initial analyses of the data to produce the themes described, the researchers sought to unpack the qualitative mechanisms of the theme 'building resilience' which seemed to underpin all of the findings. A key part of this process was to explore the categories that had been created alongside raw data and researcher memos. Two of the researchers (TW and KW) employed diagramming, comparing and integrating through drawing out thematic maps which prompted an abstract level of analysis [20]. New relationships formed from within the data and memos, which allowed for reflection on structural elements, such as micro-level (individual) and macro-level (contextual/environmental) features which were then discussed in light of quotes from the raw data. This interpretative theorising allowed the team to abstract a theory of perceived resilience created out of a dynamic interaction between the experience of the choir - influenced by past experiences of singing from childhood, environment and personal traits - and the impact of it, such as musical skills, confidence and enhanced wellbeing (see Figure 1). As a qualitative model grounded in the interconnection of data and theory, it is not possible to stipulate which factors are essential and which are peripheral to building resilience, but this model shows that there are a multiplicity of elements involved and that a combination of them resulted in enhanced, subjective resilience for the participants who took part in this study.

### **DISCUSSION**

The aim of this study was to build an understanding of how the process of group singing impacts upon those affected by cancer. Results revealed four overarching themes (building resilience for those affected by cancer, social support, psychological dimensions, and process issues), with further analysis enabling the creation of a model presenting how building resilience underpinned the findings. There were no noticeable differences in themes across the different focus groups, suggesting that these findings are relevant for patients, staff, carers and bereaved. This is also the first known study to provide a model for resilience, highlighting the mechanisms by which singing impacts upon those affected by cancer.

The key finding of this study is that group singing appears to contribute to building resilience in those affected by cancer. A general definition of resilience is the capacity to maintain healthy psychological and physical wellbeing

despite being exposed to adversity [21,22]. In light of the psychosocial challenges that can be experienced during cancer, promoting resilience has been described as a critical element of the psychosocial care for cancer patients, with suggestions that medical staff should recognise and promote mechanisms of adaptation [23]. Within cancer care, sense of confidence, self-transcendence of the cancer experience, and self-esteem have been proposed as key areas to focus on in order to build resilience [24].

With this understanding of resilience in mind, the findings of this study support group singing as an important intervention to build resilience in those affected by cancer. Group singing was seen to improve self-confidence, transcend the cancer experience through immersion in the activity and improve self-esteem through acquisition of musical skills via a balance of challenge and fun. One of the key reasons that the choir could achieve this was also through its specifically *social* nature. Community support can be harnessed for resilience, assisting in developing individual psychological and community strengths [22,25]. The choir made social connections through a group context where a fellowship among members was created. All of these elements are shown in the suggested model for building resilience.

The findings of this study also reinforce other theories concerning psychosocial needs. Lutgendorf and colleagues [26] put forward a three-factor model to suggest that social support, emotional expression and benefit finding can aid those affected by cancer, including supporting strong immune response. Choristers expressed emotions in a 'good way', attained social support through new friendships and an inclusive environment, and they found some form of benefit from their experiences through learning new skills, enhanced confidence and the enjoyable experience of singing together. Consequently, the present study suggests that these three factors can contribute to positive adjustment, including promoting resilience.

There are also indications that the results of this study resonate with theories of wellbeing. The results from this study suggest that the choir might be able to fulfil the three basic psychological needs of relatedness, competence and autonomy [27]. Firstly, the participants commented on the group and social aspects of the choir. The choir also gave a fulfilling experience – offering a sense of achievement by learning songs together – which could satisfy the need for competence. This is also supported by previous studies [12,15]. Members were also autonomous as they chose to come to choir each week, integrated the activity into their lives and were self-regulated in their attitude to learning.

More generally, this study links to concepts of enhanced wellbeing. In addition to supporting the components of increased quality of life in previous studies [12,15], it also correlates with notions of hedonic and eudaimonic wellbeing [28]. Happiness and satisfaction can be seen in themes relating to positive experiences, and psychological functioning and self-realisation are inherent in building resilience and psychological dimensions. This supports previous research which has shown that instrumental learning in adulthood can provide both immediate (hedonic) and longer-term (eudaimonic) enhancements to subjective wellbeing [29], suggesting that there might be shared mechanisms of music across different musical experiences.

The cathartic and holistic nature of the choir experience also correlates with theories of psychological 'flow' [30], providing activities that are 'oceanic', 'deeply moving' and 'mystical'. These experiences also allow complete focus on the present moment and a feeling of being in control of the environment [31]. Singing in the choir was described as cathartic by participants, in addition to being likened to mindfulness which suggests that it enabled members to focus on the present; a finding also reported in other singing studies [32,33]. The 'mystical' component of flow may be inherent in the emotional and indescribable features of the choir, likening it to a spiritual or transcendent experience. This suggestion is reinforced by other singing studies [34–36]. Moreover, it is interesting that the choristers admired and trusted their choir leader in a way that resounds with spiritual leadership where a communion is created between the leader and their fellows, whether this be choristers or a congregation [37].

As a qualitative methodology pursuing emergent analytic goals, it is not possible to make generalisations based on this study; however, the insights gained may support the development of future interventions [18]. By breaking down the elements of how choir singing may support building resilience, it may be possible for future quantitative studies to test which of these features form the constitutive elements of resilience and which are incidental. Attaining this understanding may allow for optimisation of benefits from choral singing, understanding better the relationship between singing and resilience for those affected by cancer. Another future avenue could be to conduct

an ethnography to understand the contribution of the socio-cultural context to this theory of building resilience. A limitation of this study is that it has not been able to reflect on shared patterns of behaviours and values which would enable further reflection on whether cultural components are related to health outcomes.

## Conclusion

There is a need to identify interventions which will provide psychosocial support for those affected by cancer, including patients, staff, carers and bereaved. This study has shown that group singing may be a suitable intervention, building resilience in those affected via an interaction between the holistic experience and impact of the choir context.

## Tables and figures

Table 1: Demographics of participants who took part in the study, including number of singing sessions attended.

Table 2. Themes and subthemes. Description of overarching themes and subthemes, summarising the process and impact of group singing for people affected by cancer.

Figure 1. Theory of building resilience, showing that the perceived resilience created by the choir is underpinned by the interaction of the experience of the choir and the impact of it.

## Acknowledgements

The authors wish to thank Tenovus Cancer Care, the Royal Marsden NHS Foundation Trust and the choir members who took part in the study, in addition to Saoirse Finn who supported transcription. We also wish to acknowledge The Royal Marsden Cancer Charity who funded TW's time and the infrastructure support of the Royal Marsden/Institute of Cancer Research Biomedical Research Centre.

## Contributors

The research team collaboratively designed the study. TW and DF led on the supervision of the project. KW led on the data collection with support and guidance from DF and TW. TW and KW conducted independent analysis which was discussed at team meetings, resulting in the creation of the model presented, drawn by KW. KW produced the draft of the report which was refined following detailed input from TW and DF.

## Funding

This research was supported by Tenovus Cancer Care.

## Competing interests

None declared.

## Ethical approval

The NHS Research Ethics Service approved the study.

## Data sharing statement

The data used in this research was collected subject to the informed consent of the participants. Unfortunately, the dataset is not publicly available as participants only consented to the research team having access to the raw dataset.

## REFERENCES

1. Irwin MR, Olmstead RE, Ganz PA, Haque R. Sleep disturbance, inflammation and depression risk in cancer survivors. *Brain Behav Immun*. 2013 Mar;30 Suppl:S58–67.
2. Adler NE, Page AE. *The Psychosocial Needs of Cancer Patients*. National Academies Press (US); 2008.
3. Council I of M and NR. *From Cancer Patient to Cancer Survivor: Lost in Transition*. 2005.



- 1 4. "It's no life" Living with the long-term effects of cancer. *Macmillan Cancer Care*; 2009.
- 2
- 3 5. Hodges LJ, Humphris GM, Macfarlane G. A meta-analytic investigation of the relationship between the  
4 psychological distress of cancer patients and their carers. *Soc Sci Med*. 2005 Jan;60(1):1–12.
- 5
- 6 6. Williams A-L, McCorkle R. Cancer family caregivers during the palliative, hospice, and bereavement phases: A  
7 review of the descriptive psychosocial literature. *Palliat Support Care* [Internet]. 2011 Sep 15 [cited 2017 Dec  
8 14];9(03):315–25. Available from: [http://www.journals.cambridge.org/abstract\\_S1478951511000265](http://www.journals.cambridge.org/abstract_S1478951511000265)
- 9
- 10 7. Medisauskaite A, Kamau C. Prevalence of oncologists in distress: Systematic review and meta-analysis.  
11 *Psychooncology* [Internet]. 2017;26(11):1732–40. Available from: <http://doi.org/10.1002/pon.4382>
- 12
- 13 8. Merckaert I, Libert Y, Messin S, Milani M, Slachmuylder J-L, Razavi D. Cancer patients' desire for psychological  
14 support: prevalence and implications for screening patients' psychological needs. *Psychooncology*. 2010  
15 Feb;19(2):141–9.
- 16
- 17 9. Bui LL, Last L, Bradley H, Law CHL, Maier B-A, Smith AJ. Interest and participation in support group programs  
18 among patients with colorectal cancer. *Cancer Nurs* [Internet]. 2002 Apr [cited 2017 Dec 14];25(2):150–7.  
19 Available from: <http://www.ncbi.nlm.nih.gov/pubmed/11984103>
- 20
- 21 10. Pascoe S, Edelman S, Kidman A. Prevalence of Psychological Distress and Use of Support Services by Cancer  
22 Patients at Sydney Hospitals. *Aust New Zeal J Psychiatry* [Internet]. 2000 Oct 26 [cited 2017 Dec  
23 14];34(5):785–91. Available from: <http://journals.sagepub.com/doi/10.1080/j.1440-1614.2000.00817.x>
- 24
- 25 11. Sautier L, Mehnert A, Höcker A, Schilling G. Participation in patient support groups among cancer survivors:  
26 do psychosocial and medical factors have an impact? *Eur J Cancer Care (Engl)* [Internet]. 2014 Jan [cited 2017  
27 Dec 14];23(1):140–8. Available from: <http://www.ncbi.nlm.nih.gov/pubmed/24106803>
- 28
- 29 12. Gale N, Enright S, Reagon C, Lewis I, van Deursen R. A pilot investigation of quality of life and lung function  
30 following choral singing in cancer survivors and their carers. *Ecancermedalscience* [Internet]. 2012 Jan [cited  
31 2016 May 28];6:261. Available from:  
32 <http://www.pubmedcentral.nih.gov/articlerender.fcgi?artid=3404598&tool=pmcentrez&rendertype=abstract>
- 33
- 34 13. Reagon C, Gale N, Enright S, Mann M, van Deursen R. A mixed-method systematic review to investigate the  
35 effect of group singing on health related quality of life. *Complement Ther Med* [Internet]. 2016 Aug [cited  
36 2016 May 20];27:1–11. Available from:  
37 <http://www.sciencedirect.com/science/article/pii/S0965229916300498>
- 38
- 39 14. Fancourt D, Williamon A, Carvalho L, Steptoe A, Dow R, Lewis I. Singing modulates mood, stress, cortisol,  
40 cytokine and neuropeptide activity in cancer patients and carers. *Ecancermedalscience* [Internet].  
41 2016;10(631):1–13. Available from: [http://ecancer.org/journal/10/631-singing-modulates-mood-stress-](http://ecancer.org/journal/10/631-singing-modulates-mood-stress-cortisol-cytokine-and-neuropeptide-activity-in-cancer-patients-and-carers.php)  
42 [cortisol-cytokine-and-neuropeptide-activity-in-cancer-patients-and-carers.php](http://ecancer.org/journal/10/631-singing-modulates-mood-stress-cortisol-cytokine-and-neuropeptide-activity-in-cancer-patients-and-carers.php)
- 43
- 44 15. Reagon C, Gale N, Dow R, Lewis I, van Deursen R. Choir singing and health status in people affected by cancer.  
45 *Eur J Cancer Care (Engl)*. 2016;1–10.
- 46
- 47 16. O'Callaghan CC, Hornby CJ, Pearson EJM, Ball DL. Oncology Staff Reflections about a 52-Year-Old Staff  
48 Christmas Choir: Constructivist Research. *J Palliat Med* [Internet]. 2010 Dec [cited 2017 May 22];13(12):1421–  
49 5. Available from: <http://www.liebertonline.com/doi/abs/10.1089/jpm.2010.0355>
- 50
- 51 17. DeNora T, Ansdell G. What Can't Music Do? *Psychol Well Being* [Internet]. 2014;4(23). Available from:
- 52
- 53
- 54
- 55
- 56
- 57
- 58
- 59
- 60

<https://psywb.springeropen.com/articles/10.1186/s13612-014-0023-6>

18. Charmaz K. *Constructing grounded theory*. Sage; 2014. 388
19. Corbin JM, Strauss AL. *Basics of qualitative research : techniques and procedures for developing grounded theory* [Internet]. 2015 [cited 2017 Dec 12]. 431 p. Available from: <https://us.sagepub.com/en-us/nam/basics-of-qualitative-research/book235578>
20. Charmaz K. *Constructing grounded theory*. SAGE; 2006. 224.
21. Bonanno GA. Loss, Trauma, and Human Resilience: Have We Underestimated the Human Capacity to Thrive After Extremely Aversive Events? *Am Psychol* [Internet]. 2004 Jan [cited 2017 Dec 12];59(1):20–8. Available from: <http://www.ncbi.nlm.nih.gov/pubmed/14736317>
22. Stephens C. An Integrated Model for Understanding and Developing Resilience in the Face of Adverse Events. *J PACIFIC RIM Psychol* [Internet]. 2017 [cited 2017 Dec 12];3(1):20–6. Available from: [https://www.cambridge.org/core/services/aop-cambridge-core/content/view/3B713EB3F58BA278D3F6232C98F1C89E/S1834490900000301a.pdf/an\\_integrated\\_model\\_for\\_understanding\\_and\\_developing\\_resilience\\_in\\_the\\_face\\_of\\_adverse\\_events.pdf](https://www.cambridge.org/core/services/aop-cambridge-core/content/view/3B713EB3F58BA278D3F6232C98F1C89E/S1834490900000301a.pdf/an_integrated_model_for_understanding_and_developing_resilience_in_the_face_of_adverse_events.pdf)
23. Molina Y, Yi JC, Martinez-Gutierrez J, Reding KW, Yi-Frazier JP, Rosenberg AR. Resilience among patients across the cancer continuum: diverse perspectives. *Clin J Oncol Nurs* [Internet]. 2014 Feb [cited 2017 Dec 12];18(1):93–101. Available from: <http://www.ncbi.nlm.nih.gov/pubmed/24476731>
24. Haase JE. The Adolescent Resilience Model as a Guide to Interventions. *J Pediatr Oncol Nurs* [Internet]. 2004;21(5):289–99. Available from: <http://journals.sagepub.com/doi/10.1177/1043454204267922>
25. Paton D, Johnston DM (David M. *Disaster resilience : an integrated approach*. Charles C Thomas; 2006. 321.
26. Lutgendorf SK, Costanzo ES, Siegel SD. Psychosocial Influences in Oncology: An Expanded Model of Biobehavioral Mechanisms. In: Ader R, editor. *Psychoneuroimmunology (Fourth Edition)*. Burlington: Academic Press; 2007. p. 869–95.
27. Ryan RM, Deci EL. Self-Determination Theory and the Facilitation of Intrinsic Motivation, Social Development, and Well-Being. *Am Psychol*. 2000;55(1):68–78.
28. Tennant R., Hiller L, Fishwick R, Platt S, Joseph S, Weich S, et al. The Warwick-Edinburgh Mental Well-being Scale (WEMWBS): development and UK validation. *Health Qual Life Outcomes* [Internet]. 2007 Jan [cited 2017 Mar 19];5(63). Available from: <http://hqlo.biomedcentral.com/articles/10.1186/1477-7525-5-63>
29. Perkins R, Williamon A. Learning to make music in older adulthood: A mixed-methods exploration of impacts on wellbeing. *Psychol Music*. 2014;42(4):550–67.
30. Maslow A. *Religions, values, and peak-experiences*. Ohio: Ohio State University Press; 1964.
31. Clarke EF, Dibben N, Pitts S. *Music and mind in everyday life*. Oxford University Press; 2010. 1-16; 79-91; 158-168.
32. Livesey L, Morrison I, Clift S, Camic P. Benefits of choral singing for social and mental wellbeing: qualitative findings from a cross-national survey of choir members. *J Public Ment Health*. 2012;11(1):10–26.
33. Keeler JR, Roth EA, Neuser BL, Spitsbergen JM, Waters DJM, Vianney J-M. The neurochemistry and social flow

of singing: bonding and oxytocin. *Front Hum Neurosci* [Internet]. 2015 [cited 2017 Dec 5];9:518. Available from: <http://www.ncbi.nlm.nih.gov/pubmed/26441614>

34. Dingle G a., Brander C, Ballantyne J, Baker F a. "To be heard": The social and mental health benefits of choir singing for disadvantaged adults. *Psychol Music*. 2012;41(3):405–21.
35. Clift SM, Hancox G. The perceived benefits of singing: findings from preliminary surveys of a university college choral society. *J R Soc Promot Health* [Internet]. 2001 Dec [cited 2016 May 28];121(4):248–56. Available from: <http://www.ncbi.nlm.nih.gov/pubmed/11811096>
36. Jacob C, Guptill C, Sumsion T. Motivation for continuing involvement in a leisure-based choir: The lived experiences of university choir members. *J Occup Sci* [Internet]. 2009 Oct [cited 2017 Apr 8];16(3):187–93. Available from: <http://www.tandfonline.com/doi/abs/10.1080/14427591.2009.9686661>
37. Coleman EJ. *Creativity and spirituality: bonds between art and religion* [Internet]. State University of New York Press; 1998 [cited 2017 Dec 12]. 82.

Figure 1. Theory of building resilience, supported with quotes from across the focus group and one-to-one interviews

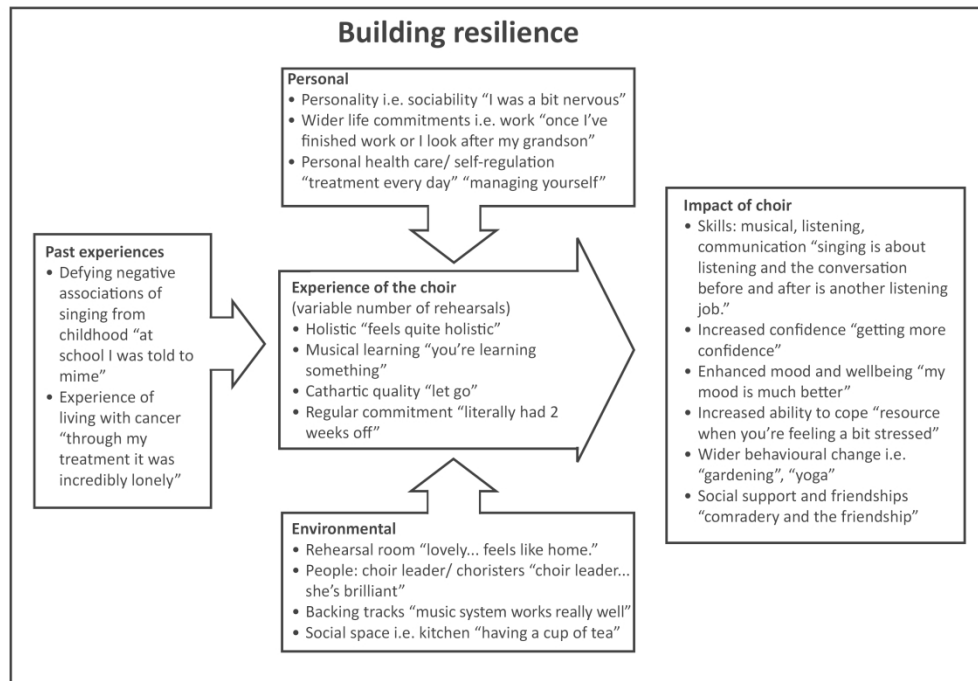

Figure 1. Theory of building resilience, showing that the perceived resilience created by the choir is underpinned by the interaction of the experience of the choir and the impact of it.

279x200mm (300 x 300 DPI)

# Reporting checklist for qualitative study.

Based on the SRQR guidelines.

## Instructions to authors

Complete this checklist by entering the page numbers from your manuscript where readers will find each of the items listed below.

Your article may not currently address all the items on the checklist. Please modify your text to include the missing information. If you are certain that an item does not apply, please write "n/a" and provide a short explanation.

Upload your completed checklist as an extra file when you submit to a journal.

In your methods section, say that you used the SRQR reporting guidelines, and cite them as:

O'Brien BC, Harris IB, Beckman TJ, Reed DA, Cook DA. Standards for reporting qualitative research: a synthesis of recommendations. *Acad Med.* 2014;89(9):1245-1251.

|                                            | Reporting Item                                                                                                                                                                                                                          | Page Number |
|--------------------------------------------|-----------------------------------------------------------------------------------------------------------------------------------------------------------------------------------------------------------------------------------------|-------------|
|                                            | #1 Concise description of the nature and topic of the study identifying the study as qualitative or indicating the approach (e.g. ethnography, grounded theory) or data collection methods (e.g. interview, focus group) is recommended | 1           |
|                                            | #2 Summary of the key elements of the study using the abstract format of the intended publication; typically includes background, purpose, methods, results and conclusions                                                             | 1           |
| Problem formulation                        | #3 Description and significance of the problem / phenomenon studied: review of relevant theory and empirical work; problem statement                                                                                                    | 1-2         |
| Purpose or research question               | #4 Purpose of the study and specific objectives or questions                                                                                                                                                                            | 1           |
| Qualitative approach and research paradigm | #5 Qualitative approach (e.g. ethnography, grounded theory, case study, phenomenology, narrative research) and                                                                                                                          | 2           |

guiding theory if appropriate; identifying the research paradigm (e.g. postpositivist, constructivist / interpretivist) is also recommended; rationale. The rationale should briefly discuss the justification for choosing that theory, approach, method or technique rather than other options available; the assumptions and limitations implicit in those choices and how those choices influence study conclusions and transferability. As appropriate the rationale for several items might be discussed together.

|    |                           |     |                                                              |       |
|----|---------------------------|-----|--------------------------------------------------------------|-------|
| 1  |                           |     |                                                              |       |
| 2  |                           |     |                                                              |       |
| 3  |                           |     |                                                              |       |
| 4  |                           |     |                                                              |       |
| 5  |                           |     |                                                              |       |
| 6  |                           |     |                                                              |       |
| 7  |                           |     |                                                              |       |
| 8  |                           |     |                                                              |       |
| 9  |                           |     |                                                              |       |
| 10 |                           |     |                                                              |       |
| 11 |                           |     |                                                              |       |
| 12 |                           |     |                                                              |       |
| 13 |                           |     |                                                              |       |
| 14 | Researcher                | #6  | Researchers' characteristics that may influence the          | 3     |
| 15 | characteristics and       |     | research, including personal attributes, qualifications /    |       |
| 16 | reflexivity               |     | experience, relationship with participants, assumptions      |       |
| 17 |                           |     | and / or presuppositions; potential or actual interaction    |       |
| 18 |                           |     | between researchers' characteristics and the research        |       |
| 19 |                           |     | questions, approach, methods, results and / or               |       |
| 20 |                           |     | transferability                                              |       |
| 21 |                           |     |                                                              |       |
| 22 |                           |     |                                                              |       |
| 23 |                           |     |                                                              |       |
| 24 |                           |     |                                                              |       |
| 25 | Context                   | #7  | Setting / site and salient contextual factors; rationale     | 2-3   |
| 26 |                           |     |                                                              |       |
| 27 |                           |     |                                                              |       |
| 28 | Sampling strategy         | #8  | How and why research participants, documents, or             | 2-3   |
| 29 |                           |     | events were selected; criteria for deciding when no          |       |
| 30 |                           |     | further sampling was necessary (e.g. sampling                |       |
| 31 |                           |     | saturation); rationale                                       |       |
| 32 |                           |     |                                                              |       |
| 33 |                           |     |                                                              |       |
| 34 |                           |     |                                                              |       |
| 35 | Ethical issues pertaining | #9  | Documentation of approval by an appropriate ethics           | 3, 10 |
| 36 | to human subjects         |     | review board and participant consent, or explanation for     |       |
| 37 |                           |     | lack thereof; other confidentiality and data security issues |       |
| 38 |                           |     |                                                              |       |
| 39 |                           |     |                                                              |       |
| 40 | Data collection methods   | #10 | Types of data collected; details of data collection          | 3     |
| 41 |                           |     | procedures including (as appropriate) start and stop         |       |
| 42 |                           |     | dates of data collection and analysis, iterative process,    |       |
| 43 |                           |     | triangulation of sources / methods, and modification of      |       |
| 44 |                           |     | procedures in response to evolving study findings;           |       |
| 45 |                           |     | rationale                                                    |       |
| 46 |                           |     |                                                              |       |
| 47 |                           |     |                                                              |       |
| 48 |                           |     |                                                              |       |
| 49 |                           |     |                                                              |       |
| 50 | Data collection           | #11 | Description of instruments (e.g. interview guides,           | 3     |
| 51 | instruments and           |     | questionnaires) and devices (e.g. audio recorders) used      |       |
| 52 | technologies              |     | for data collection; if / how the instruments(s) changed     |       |
| 53 |                           |     | over the course of the study                                 |       |
| 54 |                           |     |                                                              |       |
| 55 |                           |     |                                                              |       |
| 56 |                           |     |                                                              |       |
| 57 | Units of study            | #12 | Number and relevant characteristics of participants,         | 1,3   |
| 58 |                           |     | documents, or events included in the study; level of         |       |
| 59 |                           |     |                                                              |       |
| 60 |                           |     |                                                              |       |

|    |                                                                                              |                                                                                                                                                                                                                                                                                                              |      |
|----|----------------------------------------------------------------------------------------------|--------------------------------------------------------------------------------------------------------------------------------------------------------------------------------------------------------------------------------------------------------------------------------------------------------------|------|
|    |                                                                                              | participation (could be reported in results)                                                                                                                                                                                                                                                                 |      |
| 1  |                                                                                              |                                                                                                                                                                                                                                                                                                              |      |
| 2  |                                                                                              |                                                                                                                                                                                                                                                                                                              |      |
| 3  | Data processing                                                                              | #13 Methods for processing data prior to and during analysis, including transcription, data entry, data management and security, verification of data integrity, data coding, and anonymisation / deidentification of excerpts                                                                               | 3    |
| 4  |                                                                                              |                                                                                                                                                                                                                                                                                                              |      |
| 5  |                                                                                              |                                                                                                                                                                                                                                                                                                              |      |
| 6  |                                                                                              |                                                                                                                                                                                                                                                                                                              |      |
| 7  |                                                                                              |                                                                                                                                                                                                                                                                                                              |      |
| 8  |                                                                                              |                                                                                                                                                                                                                                                                                                              |      |
| 9  | Data analysis                                                                                | #14 Process by which inferences, themes, etc. were identified and developed, including the researchers involved in data analysis; usually references a specific paradigm or approach; rationale                                                                                                              | 3    |
| 10 |                                                                                              |                                                                                                                                                                                                                                                                                                              |      |
| 11 |                                                                                              |                                                                                                                                                                                                                                                                                                              |      |
| 12 |                                                                                              |                                                                                                                                                                                                                                                                                                              |      |
| 13 |                                                                                              |                                                                                                                                                                                                                                                                                                              |      |
| 14 |                                                                                              |                                                                                                                                                                                                                                                                                                              |      |
| 15 |                                                                                              |                                                                                                                                                                                                                                                                                                              |      |
| 16 | Techniques to enhance trustworthiness                                                        | #15 Techniques to enhance trustworthiness and credibility of data analysis (e.g. member checking, audit trail, triangulation); rationale                                                                                                                                                                     | 3    |
| 17 |                                                                                              |                                                                                                                                                                                                                                                                                                              |      |
| 18 |                                                                                              |                                                                                                                                                                                                                                                                                                              |      |
| 19 |                                                                                              |                                                                                                                                                                                                                                                                                                              |      |
| 20 |                                                                                              |                                                                                                                                                                                                                                                                                                              |      |
| 21 | Syntheses and interpretation                                                                 | #16 Main findings (e.g. interpretations, inferences, and themes); might include development of a theory or model, or integration with prior research or theory                                                                                                                                               | 3-8  |
| 22 |                                                                                              |                                                                                                                                                                                                                                                                                                              |      |
| 23 |                                                                                              |                                                                                                                                                                                                                                                                                                              |      |
| 24 |                                                                                              |                                                                                                                                                                                                                                                                                                              |      |
| 25 |                                                                                              |                                                                                                                                                                                                                                                                                                              |      |
| 26 |                                                                                              |                                                                                                                                                                                                                                                                                                              |      |
| 27 | Links to empirical data                                                                      | #17 Evidence (e.g. quotes, field notes, text excerpts, photographs) to substantiate analytic findings                                                                                                                                                                                                        | 3-8  |
| 28 |                                                                                              |                                                                                                                                                                                                                                                                                                              |      |
| 29 |                                                                                              |                                                                                                                                                                                                                                                                                                              |      |
| 30 |                                                                                              |                                                                                                                                                                                                                                                                                                              |      |
| 31 | Intergration with prior work, implications, transferability and contribution(s) to the field | #18 Short summary of main findings; explanation of how findings and conclusions connect to, support, elaborate on, or challenge conclusions of earlier scholarship; discussion of scope of application / generalizability; identification of unique contributions(s) to scholarship in a discipline or field | 8-10 |
| 32 |                                                                                              |                                                                                                                                                                                                                                                                                                              |      |
| 33 |                                                                                              |                                                                                                                                                                                                                                                                                                              |      |
| 34 |                                                                                              |                                                                                                                                                                                                                                                                                                              |      |
| 35 |                                                                                              |                                                                                                                                                                                                                                                                                                              |      |
| 36 |                                                                                              |                                                                                                                                                                                                                                                                                                              |      |
| 37 |                                                                                              |                                                                                                                                                                                                                                                                                                              |      |
| 38 |                                                                                              |                                                                                                                                                                                                                                                                                                              |      |
| 39 |                                                                                              |                                                                                                                                                                                                                                                                                                              |      |
| 40 | Limitations                                                                                  | #19 Trustworthiness and limitations of findings                                                                                                                                                                                                                                                              | 1    |
| 41 |                                                                                              |                                                                                                                                                                                                                                                                                                              |      |
| 42 |                                                                                              |                                                                                                                                                                                                                                                                                                              |      |
| 43 | Conflicts of interest                                                                        | #20 Potential sources of influence of perceived influence on study conduct and conclusions; how these were managed                                                                                                                                                                                           | 10   |
| 44 |                                                                                              |                                                                                                                                                                                                                                                                                                              |      |
| 45 |                                                                                              |                                                                                                                                                                                                                                                                                                              |      |
| 46 |                                                                                              |                                                                                                                                                                                                                                                                                                              |      |
| 47 |                                                                                              |                                                                                                                                                                                                                                                                                                              |      |
| 48 | Funding                                                                                      | #21 Sources of funding and other support; role of funders in data collection, interpretation and reporting                                                                                                                                                                                                   | 10   |
| 49 |                                                                                              |                                                                                                                                                                                                                                                                                                              |      |
| 50 |                                                                                              |                                                                                                                                                                                                                                                                                                              |      |
| 51 |                                                                                              |                                                                                                                                                                                                                                                                                                              |      |

The SRQR checklist is distributed with permission of Wolters Kluwer © 2014 by the Association of American Medical Colleges. This checklist was completed on 28. March 2018 using <http://www.goodreports.org/>, a tool made by the [EQUATOR Network](#) in collaboration with [Penelope.ai](#)
